# Supplementary material for: A facile approach for the synthesis of novel 1-oxa- and 1-aza-flavonyl-4-methyl-1H-benzo[d][1,3]oxazin-2(4H)-ones by microwave enhanced Suzuki–Miyaura coupling using bidentate chromen-4-one-based Pd(ii)–diimine complex as catalyst
Source: Royal Society of Chemistry journal article supplement (doi:10.1039/c5ra15274g), 2015-01-01

**A facile approach for the synthesis of novel 1-oxa- and 1-aza-flavonyl-4-methyl-1H-benzo[d][1,3]oxazin-2(4H)-ones by microwave enhanced Suzuki-Miyaura coupling using bidentate chromen-4-one-based Pd(II)-diimine complex as catalyst**

Sumit Kumar\* and Naseem Ahmed\*

*Department of Chemistry, Indian Institute of Technology Roorkee, Roorkee 247 667, Uttarakhand, India.*

*\*Corresponding author. Fax and Tel.: +91 1332 285745.*

E-mail address: [sumitdcy@iitr.ac.in](mailto:sumitdcy@iitr.ac.in); [nasemfcy@iitr.ac.in](mailto:nasemfcy@iitr.ac.in)

---

**SUPPORTING INFORMATION**

---

**Table of Contents**

|                                                             |                |
|-------------------------------------------------------------|----------------|
| <b>General Information .....</b>                            | <b>S2</b>      |
| <b>General Procedures.....</b>                              | <b>S2</b>      |
| <b>Characterization Data .....</b>                          | <b>S3-S17</b>  |
| <b>Reference.....</b>                                       | <b>S17</b>     |
| <b><sup>1</sup>H, <sup>13</sup>C and HRMS Spectra .....</b> | <b>S18-S47</b> |

## General Information

Unless otherwise noted, chemicals were purchased from commercial suppliers at the highest purity grade available and were used without further purification. Solvents were distilled by standard methods. Thin layer chromatography was performed on Merck precoated 0.25 mm silica gel plates (60F-254) using UV light as visualizing agent and/or iodine as developing agent. Silica gel (100-200 mesh) was used for column chromatography. Melting points were performed with Ambassador<sup>®</sup> and Digital Melting point apparatus (Nutronics), Popular India. IR spectra were recorded on FT-IR spectrometer and expressed as wave numbers (cm<sup>-1</sup>). <sup>1</sup>H and <sup>13</sup>C NMR spectra were recorded on a Brüker Avance 500 & Jeol Resonance ECX 400 spectrometer. Spectra were referenced internally to the residual proton resonance in CDCl<sub>3</sub> (δ 7.26 ppm) or with tetramethylsilane (TMS, δ 0.00 ppm) as the internal standard. Spectra were processed using Bruker Topspin<sup>®</sup> 3.0.b.8. Chemical shifts (δ) were reported as part per million (ppm) in δ scale downfield from TMS. <sup>13</sup>C NMR spectra were referenced to CDCl<sub>3</sub> (δ 77.23 ppm, the middle peak). Coupling constants are expressed in Hz. The following abbreviations are used to explain the multiplicities: s = singlet, d = doublet, t = triplet, dd = doublet of doublets, m = multiplet, br = broad. High-resolution mass spectra (HRMS) were obtained on a Brüker micrOTOF<sup>™</sup>-Q II mass spectrometer (ESIMS).

## General procedure for synthesis of Heteroarylboronic acids (3a-3c).

The synthesis followed the literature procedure.

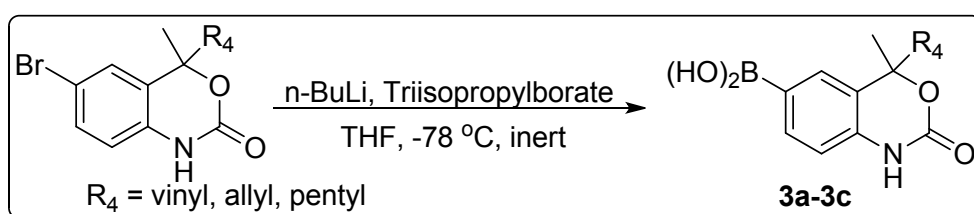

**General procedure for synthesis of compounds (4a-r, 5a-c, 6a-c):** To a G-4 process vial capped with Teflon septum was added 3-bromo flavone (1 mmol), boronic acid (1.1 mmol),

Pd-complex **C** (0.3 mol%, 1.6 mg), TBAB (0.25 mmol), K<sub>2</sub>CO<sub>3</sub> (2.5 mmol) and 6 ml of ethanol. After a pre-stirring for one minute, the vial was subjected to microwave irradiation time of 18-20 minute at 60 °C. It was then cooled to room temperature, diluted with water, and extracted with EtOAc for three times. The organic phase was dried with Na<sub>2</sub>SO<sub>4</sub> and concentrated to yield the product. The crude material was chromatographed on a silica gel column eluting with a mixture of ethyl acetate and hexane. (The purified products were identified by FTIR, NMR and HRMS spectra).

### Characterization Data

#### 3,3'-((1E,1'E)-(naphthalene-1,2-diylbis(azanylylidene))bis(methanylylidene))bis(4H-chromen-4-one) (L)

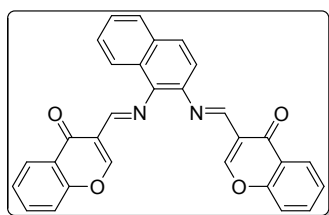

Yield: 85% as yellow solid. <sup>1</sup>H NMR (500 MHz, CDCl<sub>3</sub>, ppm): δ 8.44-8.35 (m, 1H), 8.28-8.20 (m, 2H), 7.98-7.96 (m, 1H), 7.83-7.73 (m, 2H), 7.56-7.55 (m, 1H), 7.52-7.47 (m, 3H), 7.43-7.40 (m, 2H), 7.33-7.26 (m, 2H), 7.25-7.21 (m, 2H), 7.15-7.13 (m, 1H), 6.82 (m, 1H). <sup>13</sup>C NMR (100 MHz, CDCl<sub>3</sub>, ppm): δ 178.3, 161.8, 154.7, 151.8, 143.1, 137.4, 136.4, 134.8, 127.6, 126.3, 126.0, 125.1, 124.6, 121.9, 120.3, 118.2, 113.2, 108.8. FTIR (KBr, ν = cm<sup>-1</sup>): 1715, 1645, 1624. Anal. Calcd (in %) for C<sub>30</sub>H<sub>18</sub>N<sub>2</sub>O<sub>4</sub>: C, 76.59; H, 3.86; N, 5.95. Found: C, 76.43; H, 3.72; N, 5.79. HRMS (ESI<sup>+</sup>): m/z calcd for C<sub>30</sub>H<sub>18</sub>N<sub>2</sub>NaO<sub>4</sub> [M+Na]<sup>+</sup>: 493.1158, found: 493.1158.

#### (4-methyl-2-oxo-4-vinyl-2,4-dihydro-1H-benzo[d][1,3]oxazin-6-yl)boronic acid (3a)

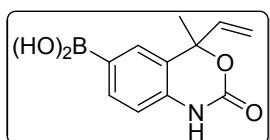

Yield: 81% as white solid; <sup>1</sup>H NMR (500 MHz, DMSO-d<sub>6</sub>, ppm): δ 10.29 (s, 1H, D<sub>2</sub>O exchangeable), 7.97 (s, 2H, D<sub>2</sub>O exchangeable), 7.68 (d, *J* = 10Hz, 2H), 6.83 (d, *J* = 8Hz, 1H), 6.01 (dd, *J* = 10.5, 18Hz, 1H), 5.16 (d, *J* = 10.5Hz, 1H), 4.98 (d, *J* = 17Hz, 1H), 1.73 (s, 3H). <sup>13</sup>C NMR (100 MHz, DMSO-d<sub>6</sub>, ppm): δ 153.4, 140.6, 137.4, 136.5, 131.4, 128.9, 123.9, 116.2, 115.0, 85.1,

26.3. FTIR (KBr,  $\nu = \text{cm}^{-1}$ ): 3408, 3279, 2978, 2930, 1718, 1645, 1513, 1355, 1248, 1088, 925. HRMS (ESI+):  $m/z$  calcd for  $\text{C}_{11}\text{H}_{13}\text{BNO}_4$   $[\text{M}+\text{H}]^+$ : 234.0932 found: 234.0930.

**(4-allyl-4-methyl-2-oxo-2,4-dihydro-1H-benzo[d][1,3]oxazin-6-yl)boronic acid (3b)**

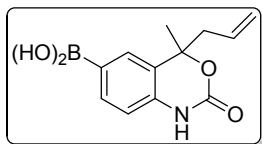

Yield: 80% as white solid;  $^1\text{H}$  NMR (500 MHz,  $\text{DMSO-d}_6$ , ppm):  $\delta$

10.16 (s, 1H,  $\text{D}_2\text{O}$  exchangeable), 7.92 (s, 2H,  $\text{D}_2\text{O}$ , exchangeable),

7.61 (t,  $J = 3.5\text{Hz}$ , 2H), 6.77 (d,  $J = 8.5\text{Hz}$ , 1H), 5.62-5.56 (m, 1H),

5.07-5.02 (m, 2H), 2.66-2.62 (m, 1H), 2.55-2.51 (m, 1H), 1.55 (s, 3H).  $^{13}\text{C}$  NMR (100 MHz,  $\text{DMSO-d}_6$ , ppm):  $\delta$  153.2, 137.3, 136.1, 132.8, 131.2, 128.7, 124.6, 121.2, 114.9, 85.9, 45.1,

27.7. FTIR (KBr,  $\nu = \text{cm}^{-1}$ ): 3430, 3158, 2978, 2934, 1720, 1656, 1383, 1342, 1257, 1109,

1042. HRMS (ESI+):  $m/z$  calcd for  $\text{C}_{12}\text{H}_{16}\text{BNO}_4$   $[\text{M}+\text{H}]^+$ : 248.1088 found: 248.1087.

**(4-methyl-2-oxo-4-pentyl-2,4-dihydro-1H-benzo[d][1,3]oxazin-6-yl)boronic acid (3c)**

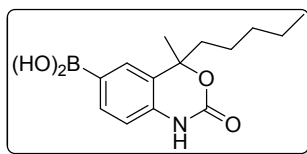

Yield: 95% as yellow solid;  $^1\text{H}$  NMR (500 MHz,  $\text{CDCl}_3$ , ppm):  $\delta$

9.76 (s, 1H,  $\text{D}_2\text{O}$  exchangeable), 7.41 (d,  $J = 8.5\text{ Hz}$ , 1H), 7.18 (s,

1H), 6.86 (d,  $J = 8.5\text{ Hz}$ , 1H), 2.03-1.98 (m, 2H), 1.75 (s, 3H),

1.49-1.35 (m, 6H), 0.94 (t,  $J = 7\text{ Hz}$ , 3H).  $^{13}\text{C}$  NMR (125 MHz,  $\text{CDCl}_3$ , ppm):  $\delta$  153.0, 133.6,

131.8, 127.0, 126.9, 116.5, 115.8, 85.5, 41.1, 31.9, 27.2, 23.3, 22.6, 14.8. HRMS (ESI+):  $m/z$

calcd. for  $\text{C}_{14}\text{H}_{21}\text{BNO}_4$   $[\text{M}+\text{H}]^+$ : 278.1558.

**6-(2-(4-methoxyphenyl)-4-oxo-4H-chromen-3-yl)-4-methyl-4-vinyl-1H-benzo[d][1,3]oxazin-2(4H)-one (4a)**

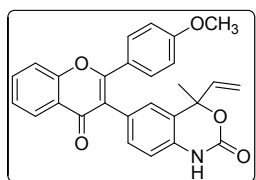

Yield: 95% as brown solid, mp 160-168  $^\circ\text{C}$ ;  $^1\text{H}$  NMR (500 MHz,

$\text{CDCl}_3$ , ppm):  $\delta$  9.08 (s, 1H,  $\text{D}_2\text{O}$  exchangeable), 8.27 (d,  $J = 8\text{Hz}$ , 1H),

7.80 (d,  $J = 9\text{Hz}$ , 1H), 7.7 (t,  $J = 8.5\text{ Hz}$ , 1H), 7.48 (d,  $J = 8\text{ Hz}$ , 1H),

7.44 (t,  $J = 7.5\text{ Hz}$ , 1H), 7.37 (dd,  $J = 1.5, 8.5\text{ Hz}$ , 1H), 7.13 (d,  $J = 8\text{Hz}$ , 1H), 7.08-7.02 (m,

3H), 6.87 (d,  $J = 8\text{Hz}$ , 1H), 6.06-5.97 (m, 1H), 5.26-5.06 (m, 2H), 3.90 (s, 3H), 1.82 (s, 3H).

$^{13}\text{C}$  NMR (125 MHz,  $\text{CDCl}_3$ , ppm):  $\delta$  174.8, 164.5, 161.8, 155.9, 153.0, 139.4, 134.2, 132.3,

131.5, 129.4, 127.5, 127.3, 126.8, 125.9, 124.5, 123.6, 120.0, 117.7, 115.7, 114.8, 113.8,

113.7, 87.7, 55.6, 25.7. FTIR (KBr,  $\nu = \text{cm}^{-1}$ ): 3256, 2955, 1709, 1655, 1615, 1587, 1505, 1463, 1345, 1333, 1306. HRMS (ESI+):  $m/z$  calcd. for  $\text{C}_{27}\text{H}_{22}\text{NO}_5$   $[\text{M}+\text{H}]^+$  : 440.1492 found : 440.1495.

**6-(2-(3,4-dimethoxyphenyl)-4-oxo-4H-chromen-3-yl)-4-methyl-4-vinyl-1H-benzo[d][1,3]oxazin-2(4H)-one (4b)**

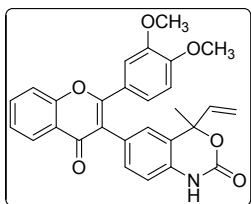

Yield: 91% as brown solid, mp 139-143 °C;  $^1\text{H}$  NMR (500 MHz,  $\text{CDCl}_3$ , ppm):  $\delta$  8.93 (s, 1H,  $\text{D}_2\text{O}$  exchangeable), 8.28 (d,  $J = 8$  Hz, 1H), 7.70 (t,  $J = 8$  Hz, 1H), 7.51 (t,  $J = 8$  Hz, 2H), 7.46 (d,  $J = 7.5$  Hz, 1H), 7.35 (dd,  $J = 1.5, 8$  Hz, 1H), 7.13 (d,  $J = 7.5$  Hz, 1H), 7.06 (t,  $J = 7.5$  Hz, 1H), 7.00 (d,  $J = 8.5$  Hz, 1H), 6.87 (d,  $J = 7.5$  Hz, 1H), 6.05-5.96 (m, 1H), 5.25-5.05 (m, 2H), 3.95 (s, 6H), 1.81 (s, 3H).  $^{13}\text{C}$  NMR (125 MHz,  $\text{CDCl}_3$ , ppm):  $\delta$  173.4, 161.9, 155.7, 151.6, 148.6, 139.4, 134.6, 134.2, 132.3, 129.4, 127.5, 126.7, 125.8, 125.2, 124.5, 123.8, 123.5, 123.3, 121.9, 117.9, 114.8, 112.6, 110.7, 108.7, 83.8, 56.2, 25.7. FTIR (KBr,  $\nu = \text{cm}^{-1}$ ): 3267, 2975, 1713, 1652, 1611, 1557, 1505, 1463, 1350, 1328, 1306. HRMS (ESI+):  $m/z$  calcd. for  $\text{C}_{28}\text{H}_{23}\text{NNaO}_6$   $[\text{M}+\text{Na}]^+$  : 492.1417 found : 492.1431.

**4-methyl-6-(4-oxo-2-(3,4,5-trimethoxyphenyl)-4H-chromen-3-yl)-4-vinyl-1H-benzo[d][1,3]oxazin-2(4H)-one (4c)**

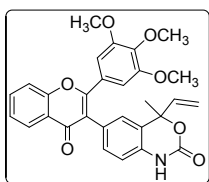

Yield: 89% as brown solid, mp 140-145 °C;  $^1\text{H}$  NMR (500 MHz,  $\text{CDCl}_3$ , ppm):  $\delta$  8.95 (s, 1H,  $\text{D}_2\text{O}$  exchangeable), 8.28 (d,  $J = 8$  Hz, 1H), 7.72-7.68 (m, 1H), 7.51 (s, 1H), 7.36 (dd,  $J = 2, 8.5$  Hz, 1H), 7.12 (d,  $J = 7.5$  Hz, 1H), 7.06 (t,  $J = 7.5$  Hz, 1H), 7.00 (d,  $J = 8.5$  Hz, 1H), 6.87 (d,  $J = 8$  Hz, 1H), 6.04-5.96 (m, 1H), 5.25-5.05 (m, 2H), 3.96 (s, 3H), 3.95 (s, 6H), 1.81 (s, 3H).  $^{13}\text{C}$  NMR (100 MHz,  $\text{CDCl}_3$ , ppm):  $\delta$  173.3, 161.9, 155.6, 153.1, 139.4, 134.4, 132.3, 129.4, 127.9, 127.5, 126.7, 125.9, 124.5, 123.5, 118.0, 115.7, 114.7, 107.1, 82.4, 61.2, 56.5, 25.7. FTIR (KBr,  $\nu = \text{cm}^{-1}$ ): 3269,

2959, 1713, 1690, 1652, 1621, 1555, 1513, 1473, 1359, 1336, 1321. HRMS (ESI+):  $m/z$  calcd. for  $C_{29}H_{26}NO_7$   $[M+H]^+$  : 522.1523 found : 522.1501.

**4-allyl-6-(2-(4-methoxyphenyl)-4-oxo-4H-chromen-3-yl)-4-methyl-1H-benzo[d][1,3]oxazin-2(4H)-one (4d)**

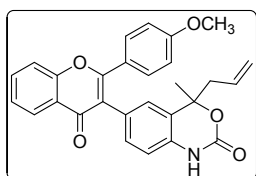

Yield: 94% as brown solid, mp 124-125 °C;  $^1H$  NMR (500 MHz,  $CDCl_3$ , ppm):  $\delta$  9.74 (s, 1H,  $D_2O$  exchangeable), 8.27 (d,  $J = 8$  Hz, 1H), 7.72 (s, 1H), 7.53-7.50 (m, 1H), 7.46-7.42 (m, 1H), 7.31 (d,  $J = 8.5$  Hz, 2H), 7.17 (s, 1H), 7.01 (s, 2H), 7.00 (d,  $J = 8.5$  Hz, 1H), 6.78 (d,  $J = 8.5$  Hz, 1H), 5.75-5.66 (m, 1H), 5.13-5.01 (m, 2H), 3.9 (s, 3H), 2.69-2.60 (m, 2H), 1.67 (s, 3H).  $^{13}C$  NMR (125 MHz,  $CDCl_3$ , ppm):  $\delta$  173.5, 162.0, 155.7, 152.5, 151.6, 148.6, 135.2, 134.3, 133.7, 132.0, 131.1, 127.1, 125.9, 123.3, 121.8, 120.5, 117.9, 116.4, 115.7, 112.5, 110.6, 108.6, 84.3, 56.3, 45.5, 26.3. FTIR (KBr,  $\nu = cm^{-1}$ ): 3267, 2975, 1713, 1692, 1652, 1611, 1557, 1505, 1463, 1350, 1328, 1306. HRMS (ESI+):  $m/z$  calcd. for  $C_{28}H_{24}NO_5$   $[M+H]^+$ : 454.1648 found : 454.1636.

**4-allyl-6-(2-(3,4-dimethoxyphenyl)-4-oxo-4H-chromen-3-yl)-4-methyl-1H-benzo[d][1,3]oxazin-2(4H)-one (4e)**

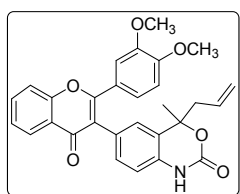

Yield: 92% as brown solid, mp 117-119 °C;  $^1H$  NMR (500 MHz,  $CDCl_3$ , ppm):  $\delta$  9.40 (s, 1H,  $D_2O$  exchangeable), 8.29 (d,  $J = 8$  Hz, 1H), 7.91 (s, 1H), 7.27 (t,  $J = 8$  Hz, 1H), 7.53-7.45 (m, 2H), 7.32 (d,  $J = 8$  Hz, 1H), 7.18 (s, 1H), 7.10 (d,  $J = 18$  Hz, 2H), 6.79 (d,  $J = 8.5$  Hz, 1H), 5.73-5.65 (m, 1H), 5.14-5.09 (m, 2H), 3.93 (d, 6H), 2.67-2.63 (m, 2H), 1.68 (s, 3H).  $^{13}C$  NMR (125 MHz,  $CDCl_3$ , ppm):  $\delta$  173.5, 162.0, 155.7, 152.6, 151.6, 148.6, 135.2, 134.3, 133.7, 132.0, 131.1, 127.1, 126.6, 125.9, 125.1, 123.4, 121.8, 120.5, 118.0, 116.4, 115.7, 112.5, 110.7, 108.7, 84.6, 56.3, 56.2, 45.5, 26.3. FTIR (KBr,  $\nu = cm^{-1}$ ): 3265, 2975, 1713, 1652, 1641, 1555, 1513, 1473, 1349,

1331, 1311. HRMS (ESI+):  $m/z$  calcd. for  $C_{29}H_{25}NNaO_6$   $[M+Na]^+$  :506.1574 found : 506.1575.

**4-allyl-4-methyl-6-(4-oxo-2-(3,4,5-trimethoxyphenyl)-4H-chromen-3-yl)-1H-benzo[d][1,3]oxazin-2(4H)-one (4f)**

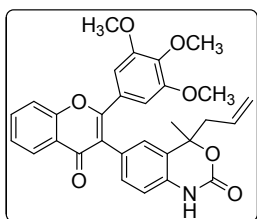

Yield: 88% as brown solid, mp 118-120 °C;  $^1H$  NMR (500 MHz,  $CDCl_3$ , ppm):  $\delta$ 10.08 (s, 1H,  $D_2O$  exchangeable), 8.19 (dd,  $J = 8$  Hz, 1H), 7.75 (s, 1H), 7.69-7.64 (m, 1H), 7.55-7.47 (m, 1H), 7.43-7.35 (m, 1H), 7.12-7.10 (m, 2H), 7.04 (s, 1H), 6.80-6.78 (m, 1H), 5.68-5.60 (m, 1H), 5.08-5.04 (m, 2H), 3.90 (s, 6H), 3.8 (s, 3H), 2.64-2.54 (m, 2H), 1.62 (s, 3H).  $^{13}C$  NMR (125 MHz,  $CDCl_3$ , ppm):  $\delta$ 173.4, 162.0, 153.1, 152.4, 140.6, 135.0, 134.4, 133.7, 132.0, 131.1, 127.9, 127.2, 126.7, 126.6, 126.0, 121.8, 121.4, 120.5, 118.0, 116.4, 115.7, 107.2, 84.4, 61.2, 56.6, 45.5, 26.3. FTIR (KBr,  $\nu = cm^{-1}$ ): 3235, 2934, 1716, 1686, 1645, 1592, 1463, 1406. HRMS (ESI+):  $m/z$  calcd. for  $C_{30}H_{27}NNaO_7$   $[M+Na]^+$  : 536.1679 found : 536.1678.

**6-(2-(4-methoxyphenyl)-4-oxo-4H-chromen-3-yl)-4-methyl-4-pentyl-1H-benzo[d][1,3]oxazin-2(4H)-one (4g)**

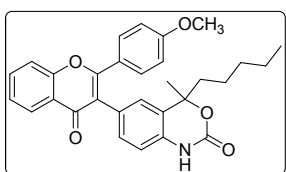

Yield: 90% as white solid, mp 113-114 °C;  $^1H$  NMR (500 MHz,  $CDCl_3$ , ppm):  $\delta$ 9.90 (s, 1H,  $D_2O$  exchangeable), 8.14 (dd,  $J = 8$  Hz, 1H), 7.78 (d,  $J = 8.5$  Hz, 1H), 7.67 (t,  $J = 8$  Hz, 1H), 7.42 (m, 2H), 7.28 (d,  $J = 8.5$  Hz, 1H), 7.15 (s, 2H), 6.99 (d,  $J = 8.5$  Hz, 2H), 6.79 (d,  $J = 8.5$  Hz, 1H), 3.86 (s, 3H), 1.91-1.87 (m, 2H), 1.64 (s, 3H), 1.37-1.24 (m, 6H), 0.82 (t,  $J = 8$  Hz, 3H).  $^{13}C$  NMR (125 MHz,  $CDCl_3$ , ppm):  $\delta$  178.0, 155.9, 155.4, 152.8, 146.4, 146.0, 133.9, 133.7, 131.7, 127.0, 126.9, 125.8, 125.3, 124.2, 118.0, 116.5, 115.7, 113.3, 112.6, 105.5, 85.4, 41.0, 31.8, 27.1, 23.2, 22.5, 14.1. FTIR (KBr,  $\nu = cm^{-1}$ ): 3228, 2934, 2869, 1705, 1687, 1615,

1463, 1406, 1352. HRMS (ESI+):  $m/z$  calcd. for  $C_{30}H_{29}NNaO_5$   $[M+Na]^+$  : 506.1937 found : 506.1921.

**6-(2-(3,4-dimethoxyphenyl)-4-oxo-4H-chromen-3-yl)-4-methyl-4-pentyl-1H-benzo[d][1,3]oxazin-2(4H)-one (4h)**

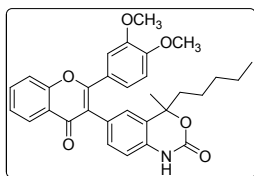

Yield: 89% as white solid, mp 109-110 °C;  $^1H$  NMR (500 MHz,  $CDCl_3$ , ppm):  $\delta$ 9.61 (s, 1H,  $D_2O$  exchangeable), 7.80-7.69 (m, 1H), 7.51 (t,  $J$  = 7.5 Hz, 1H), 7.46-7.41 (m, 1H), 7.31 (d,  $J$  = 8.5 Hz, 1H), 7.15 (s, 1H), 6.78 (d,  $J$  = 8 Hz, 1H), 3.95-3.96 (d, 6H), 1.92-1.88 (m, 2H), 1.65 (s, 3H), 1.37-1.28 (m, 8H), 0.84 (t,  $J$  = 8 Hz, 3H).  $^{13}C$  NMR (125 MHz,  $CDCl_3$ , ppm):  $\delta$ 173.4, 161.9, 152.7, 152.9, 151.6, 148.6, 134.2, 133.6, 131.8, 127.0, 126.9, 126.7, 125.8, 125.2, 123.3, 121.8, 117.9, 116.5, 115.8, 112.6, 110.7, 108.7, 85.5, 56.3, 56.2, 41.0, 31.9, 27.2, 23.3, 22.5, 14.1. HRMS (ESI+):  $m/z$  calcd. for  $C_{31}H_{31}NNaO_6$   $[M+Na]^+$ : 536.2043 found: 536.2034.

**4-methyl-6-(4-oxo-2-(3,4,5-trimethoxyphenyl)-4H-chromen-3-yl)-4-pentyl-1H-benzo[d][1,3]oxazin-2(4H)-one (4i)**

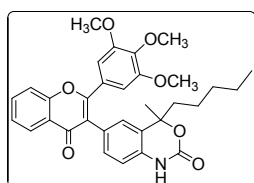

Yield: 87% as white solid, mp 155-158 °C;  $^1H$  NMR (500 MHz,  $CDCl_3$ , ppm):  $\delta$ 9.63 (s, 1H,  $D_2O$  exchangeable), 8.28 (d,  $J$  = 8 Hz, 1H), 7.72 (t,  $J$  = 8 Hz, 1H), 7.52-7.44 (m, 2H), 7.31 (d,  $J$  = 8.5 Hz, 1H), 7.16 (s, 1H), 7.09 (s, 2H), 6.79 (d,  $J$  = 8 Hz, 1H), 3.93 (d, 9H), 1.92-1.89 (m, 2H), 1.65 (s, 3H), 1.31-1.23 (m, 6H), 0.83 (t,  $J$  = 7 Hz, 3H).  $^{13}C$  NMR (125 MHz,  $CDCl_3$ , ppm):  $\delta$ 173.3, 161.9, 155.6, 153.1, 152.9, 140.6, 134.4, 133.6, 131.8, 127.9, 127.0, 126.9, 126.7, 126.0, 121.8, 118.0, 116.5, 115.8, 109.1, 107.2, 85.5, 61.1, 56.5, 41.0, 31.8, 27.2, 23.2, 22.5, 14.1. HRMS (ESI+):  $m/z$  calcd. for  $C_{32}H_{33}NNaO_7$   $[M+Na]^+$ : 566.2149 found: 566.2151.

**6-(2-(4-methoxyphenyl)-4-oxo-1,4-dihydroquinolin-3-yl)-4-methyl-4-vinyl-1H-benzo[d][1,3]oxazin-2(4H)-one (4j)**



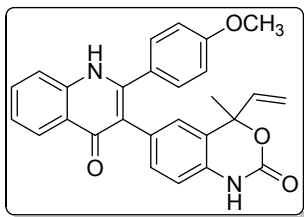

Yield: 86% as brown solid, mp 159-161 °C; <sup>1</sup>H NMR (500 MHz, CDCl<sub>3</sub>, ppm): δ9.49 (s, 1H, D<sub>2</sub>O exchangeable), 9.08 (s, 1H, D<sub>2</sub>O exchangeable), 8.28 (d, *J* = 8 Hz, 1H), 7.79 (d, *J* = 9 Hz, 1H), 7.70 (t, *J* = 8.5 Hz, 1H), 7.37 (dd, *J* = 1.5, 8.5 Hz, 1H), 7.13 (d, *J* = 8

Hz, 1H), 7.08-7.02 (m, 2H), 6.87 (d, *J* = 8 Hz, 1H), 6.84 (d, *J* = 8 Hz, 1H), 6.06-6.00 (m, 1H), 5.26-5.06 (m, 2H), 3.90 (s, 3H), 1.82 (t, *J* = 8 Hz, 3H). <sup>13</sup>C NMR (125 MHz, CDCl<sub>3</sub>, ppm): δ174.8, 164.5, 161.8, 155.9, 139.4, 138.7, 134.6, 134.2, 132.3, 131.5, 129.4, 127.5, 123.6, 120.0, 117.7, 115.7, 114.8, 113.7, 87.7, 55.6, 25.7. FTIR (KBr, ν = cm<sup>-1</sup>): 3305, 3267, 2975, 1714, 1692, 1641, 1557, 1505, 1463. HRMS (ESI<sup>+</sup>): *m/z* calcd. for C<sub>27</sub>H<sub>22</sub>N<sub>2</sub>NaO<sub>4</sub> [M+Na]<sup>+</sup> : 461.1471 found : 461.1467.

**6-(2-(3,4-dimethoxyphenyl)-4-methyl-4-vinyl-1H-benzo[d][1,3]oxazin-2(4H)-one (4k)**

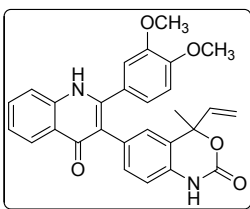

Yield: 85% as Brown solid, mp 147-150 °C; <sup>1</sup>H NMR (500 MHz, CDCl<sub>3</sub>, ppm): δ9.31 (s, 1H, D<sub>2</sub>O exchangeable), 8.93 (s, 1H, D<sub>2</sub>O exchangeable), 8.28 (d, *J* = 8 Hz, 1H), 7.70 (t, *J* = 8 Hz, 1H), 7.51 (t, *J* = 8.5 Hz, 2H), 7.46 (d, *J* = 8 Hz, 1H), 7.36 (dd, *J* = 1.5, 8.5 Hz, 1H), 7.13 (d, *J* = 7.5 Hz, 1H),

7.06 (t, *J* = 7.5 Hz, 1H), 6.99 (d, *J* = 8.5 Hz, 1H), 6.87 (d, *J* = 7.5 Hz, 1H), 6.05-5.98 (m, 1H), 5.20-5.05 (m, 2H), 3.95 (s, 6H), 1.81 (t, *J* = 8 Hz, 3H). <sup>13</sup>C NMR (125 MHz, CDCl<sub>3</sub>, ppm): δ174.8, 164.5, 161.8, 156.0, 153.2, 139.4, 138.7, 134.6, 134.2, 133.8, 132.3, 131.5, 129.4, 127.5, 126.9, 125.9, 124.5, 123.8, 123.6, 120.1, 117.7, 115.8, 114.8, 113.7, 84.3, 55.8, 25.8. HRMS (ESI<sup>+</sup>): *m/z* calcd. for C<sub>28</sub>H<sub>24</sub>N<sub>2</sub>NaO<sub>5</sub> [M+Na]<sup>+</sup>: 491.1577 found : 491.1572.

**4-methyl-6-(4-oxo-2-(3,4,5-trimethoxyphenyl)-1,4-dihydroquinolin-3-yl)-4-vinyl-1H-benzo[d][1,3]oxazin-2(4H)-one (4l)**

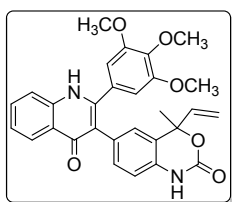

Yield: 85% as Brown solid, mp 112-115 °C; <sup>1</sup>H NMR (500 MHz, CDCl<sub>3</sub>, ppm): δ9.31 (s, 1H, D<sub>2</sub>O exchangeable), 8.93 (s, 1H, D<sub>2</sub>O exchangeable), 8.26 (d, *J* = 8Hz, 1H), 7.70-7.68 (m, 1H), 7.50 (s, 1H), 7.34 (dd, *J* = 2, 8.5 Hz, 1H), 7.11 (d, *J* = 7.5 Hz, 1H), 7.04 (t, *J* = 7.5 Hz, 1H), 6.98 (d, *J* = 8.5 Hz, 1H), 6.86(d, *J* = 8 Hz, 1H), 6.03-5.94 (m, 1H), 5.23-5.03 (m, 2H), 3.95 (s, 3H), 3.94 (s, 6H), 1.79 (s, 3H). <sup>13</sup>C NMR (125 MHz, CDCl<sub>3</sub>, ppm): δ174.7, 164.1, 161.5, 156.5, 153.6, 139.1, 138.5, 134.1, 134.0, 133.6, 132.2, 131.4, 129.3, 127.4, 126.8, 125.4, 124.2, 123.7, 123.5, 120.1, 117.5, 115.7, 84.3, 60.5, 55.8, 25.7. HRMS (ESI+): *m/z* calcd. for C<sub>29</sub>H<sub>26</sub>N<sub>2</sub>NaO<sub>6</sub> [M+Na]<sup>+</sup> : 521.1683 found : 521.1682.

**4-allyl-6-(2-(4-methoxyphenyl)-4-oxo-1,4-dihydroquinolin-3-yl)-4-methyl-1H-benzo[d][1,3]oxazin-2(4H)-one (4m)**

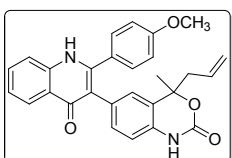

Yield: 86% as Brown solid, mp 138-141 °C; <sup>1</sup>H NMR (500 MHz, CDCl<sub>3</sub>, ppm): δ9.61 (s, 1H, D<sub>2</sub>O exchangeable), 8.26 (dd, *J* = 1, 8 Hz, 1H), 7.80 (d, *J* = 8.5 Hz, 2H), 7.68 (t, *J* = 7.5 Hz, 1H), 7.48 (d, *J* = 8.5 Hz, 1H), 7.43 (t, *J* = 7 Hz, 1H), 7.32 (dd, *J* = 1.5, 8.5 Hz, 1H), 7.18 (s, 1H), 7.02 (d, *J* = 8.5 Hz, 2H), 6.77 (d, *J* = 8.5 Hz, 1H), 6.23 (s, 1H, D<sub>2</sub>O exchangeable), 5.72-5.65 (m, 1H), 5.14-5.09 (m, 2H), 3.89 (s, 3H, 2.70-2.62 (m, 2H), 1.68 (s, 3H). <sup>13</sup>C NMR (125 MHz, CDCl<sub>3</sub>, ppm): δ175.0, 164.6, 161.8, 155.9, 152.5, 134.3, 133.7, 132.0, 131.9, 131.5, 131.1, 127.2, 127.1, 126.8, 126.6, 125.9, 120.5, 120.0, 117.7, 116.6, 115.7, 113.7, 84.3, 55.6, 45.5, 26.3. FTIR (KBr, ν = cm<sup>-1</sup>): 3394, 3293, 2957, 2930, 1712, 1686, 1646, 1610, 1572, 1355. HRMS (ESI+): *m/z* calcd. for C<sub>28</sub>H<sub>24</sub>N<sub>2</sub>NaO<sub>4</sub> [M+Na]<sup>+</sup> : 475.1628 found : 475.1631.

**4-allyl-6-(2-(3,4-dimethoxyphenyl)-4-oxo-1,4-dihydroquinolin-3-yl)-4-methyl-1H-benzo[d][1,3]oxazin-2(4H)-one (4n)**

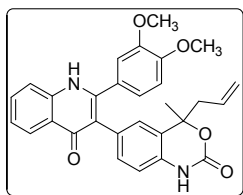

Yield: 85% as Brown solid, mp 160-165 °C; <sup>1</sup>H NMR (500 MHz, CDCl<sub>3</sub>, ppm): δ 9.66 (s, 1H, D<sub>2</sub>O exchangeable), 8.28 (dd, *J* = 1, 8 Hz, 1H), 7.74-7.71 (m, 2H), 7.52 (d, *J* = 8 Hz, 1H), 7.46 (t, *J* = 7 Hz, 1H), 7.31 (dd, *J* = 1.5, 8 Hz, 1H), 7.17 (d, *J* = 1.5 Hz, 1H), 7.09 (s, 2H), 6.78 (d, *J* = 8.5 Hz, 1H), 5.71-5.67 (m, 1H), 5.52 (s, 1H, D<sub>2</sub>O exchangeable), 5.13-5.09 (m, 2H), 3.94 (s, 3H), 2.69-2.60 (m, 2H), 1.67 (s, 3H). <sup>13</sup>C NMR (125 MHz, CDCl<sub>3</sub>, ppm): δ 174.1, 152.4, 150.5, 150.3, 148.5, 139.4, 135.2, 133.7, 132.2, 132.0, 131.1, 127.2, 126.6, 124.4, 123.5, 122.3, 121.9, 120.5, 116.4, 115.7, 112.6, 110.6, 84.3, 56.1, 56.0, 45.5, 26.3. FTIR (KBr, ν = cm<sup>-1</sup>): 3375, 3290, 2987, 2927, 1713, 1677, 1648, 1601, 1407, 1352. HRMS (ESI<sup>+</sup>): *m/z* calcd. for C<sub>29</sub>H<sub>26</sub>N<sub>2</sub>NaO<sub>5</sub> [M+Na]<sup>+</sup>: 505.1733 found: 505.1733.

**4-allyl-4-methyl-6-(4-oxo-2-(3,4,5-trimethoxyphenyl)-1,4-dihydroquinolin-3-yl)-1H-benzo[d][1,3]oxazin-2(4H)-one (4o)**

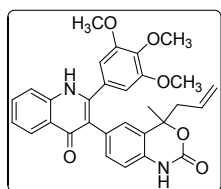

Yield: 81% as Brown solid, mp 178-180 °C; <sup>1</sup>H NMR (500 MHz, CDCl<sub>3</sub>, ppm): δ 9.71 (s, 1H, D<sub>2</sub>O exchangeable), 9.20 (s, 1H, D<sub>2</sub>O exchangeable), 8.24 (d, *J* = 8 Hz, 1H), 7.83 (d, *J* = 8 Hz, 1H), 7.63-7.58 (m, 2H), 7.34-7.28 (m, 2H), 7.15 (s, 1H), 7.03 (s, 1H), 6.78 (d, *J* = 8.5 Hz, 1H), 5.71-5.63 (m, 1H), 5.12-5.07 (m, 2H), 3.77 (s, 9H), 2.67-2.58 (m, 2H), 1.65 (s, 3H). <sup>13</sup>C NMR (125 MHz, CDCl<sub>3</sub>, ppm): δ 173.9, 152.8, 152.3, 150.5, 139.4, 138.9, 135.1, 133.7, 131.9, 131.1, 130.3, 127.1, 126.5, 126.0, 124.5, 123.4, 121.7, 120.4, 118.7, 116.4, 115.6, 106.8, 84.2, 60.9, 56.3, 45.5, 26.3. HRMS (ESI<sup>+</sup>): *m/z* calcd. for C<sub>30</sub>H<sub>28</sub>N<sub>2</sub>NaO<sub>6</sub> [M+Na]<sup>+</sup>: 535.1839 found: 535.1841.

**6-(2-(4-methoxyphenyl)-4-oxo-1,4-dihydroquinolin-3-yl)-4-methyl-4-pentyl-1H-benzo[d][1,3]oxazin-2(4H)-one (4p)**

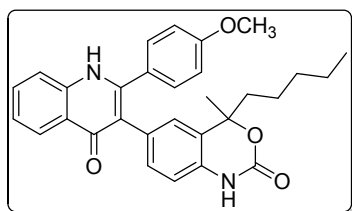

Yield: 83% as white solid, mp 145-148 °C; <sup>1</sup>H NMR (500 MHz, CDCl<sub>3</sub>, ppm): δ 9.90 (s, 1H, D<sub>2</sub>O exchangeable), 8.24 (d, *J* = 8 Hz, 1H), 7.78 (d, *J* = 8.5 Hz, 1H), 7.65 (t, *J* = 7.5 Hz, 1H), 7.46-7.39 (m, 2H), 7.29 (d, *J* = 8.5 Hz, 1H), 7.15 (s, 2H), 7.00 (d, *J* = 8.5 Hz, 2H), 6.80 (d, *J* = 8.5 Hz, 1H), 5.82 (s, 1H, D<sub>2</sub>O exchangeable), 3.86 (s, 3H), 1.92-1.87 (m, 2H), 1.64 (s, 3H), 1.37-1.29 (m, 6H), 0.82 (s, 3H). <sup>13</sup>C NMR (125 MHz, CDCl<sub>3</sub>, ppm): δ 174.9, 164.5, 161.8, 155.9, 153.0, 145.1, 134.2, 131.7, 131.5, 127.2, 127.0, 126.9, 126.8, 125.9, 120.0, 117.6, 116.5, 115.7, 113.7, 85.4, 55.6, 41.0, 31.8, 27.1, 23.2, 22.5, 14.0. FTIR (KBr, ν = cm<sup>-1</sup>): 3375, 3290, 2987, 2927, 1710, 1677, 1643, 1407, 1352. HRMS (ESI<sup>+</sup>): *m/z* calcd. for C<sub>30</sub>H<sub>30</sub>N<sub>2</sub>NaO<sub>4</sub> [M+Na]<sup>+</sup> : 505.2097 found : 505.2096.

**6-(2-(3,4-dimethoxyphenyl)-4-oxo-1,4-dihydroquinolin-3-yl)-4-methyl-4-pentyl-1H-benzo[d][1,3]oxazin-2(4H)-one (4q)**

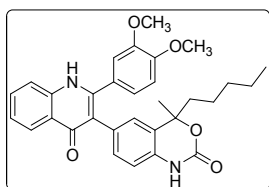

Yield: 85% as white solid, mp 117-118 °C; <sup>1</sup>H NMR (500 MHz, DMSO, ppm): δ 12.18, (s, 1H, D<sub>2</sub>O exchangeable), 10.28 (s, 1H, D<sub>2</sub>O exchangeable), 8.16 (d, *J* = 8 Hz, 1H), 7.68 (d, *J* = 3.5 Hz, 2H), 7.41-7.38 (m, 3H), 7.23-7.13 (m, 2H), 7.02 (s, 1H), 6.82 (d, *J* = 8.5 Hz, 1H), 3.84 (s, 3H), 3.82 (s, 3H), 1.91 (t, *J* = 13 Hz, 2H), 1.56 (s, 3H), 1.28-0.80 (m, 6H), 0.79 (t, *J* = 7 Hz, 3H). <sup>13</sup>C NMR (125 MHz, CDCl<sub>3</sub>, ppm): δ 173.4, 161.9, 155.6, 152.9, 151.6, 148.6, 134.2, 133.6, 131.8, 126.9, 126.6, 125.8, 125.2, 123.3, 121.8, 117.9, 116.5, 115.8, 112.5, 110.7, 108.7, 85.5, 56.3, 56.2, 41.0, 31.8, 27.2, 23.2, 22.5, 14.1. HRMS (ESI<sup>+</sup>): *m/z* calcd. for C<sub>31</sub>H<sub>32</sub>N<sub>2</sub>NaO<sub>5</sub> [M+Na]<sup>+</sup> : 535.2203 found: 535.2170.

**4-methyl-6-(4-oxo-2-(3,4,5-trimethoxyphenyl)-1,4-dihydroquinolin-3-yl)-4-pentyl-1H-benzo[d][1,3]oxazin-2(4H)-one (4r)**

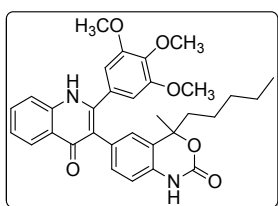

Yield: 84% as white solid, mp 110-113 °C; <sup>1</sup>H NMR (500 MHz, DMSO, ppm): δ 12.25 (s, 1H, D<sub>2</sub>O exchangeable), 10.27 (s, 1H, D<sub>2</sub>O exchangeable), 8.29-8.22 (m, 1H), 8.15 (t, *J* = 8 Hz, 1H), 7.41-7.38 (m, 4H), 7.28 (s, 1H), 6.93 (d, *J* = 21.5 Hz, 1H), 6.82 (d, *J* = 8.5 Hz, 1H), 3.83 (s, 6H), 3.74 (s, 3H), 1.93-1.74 (m, 2H), 1.56 (s, 3H), 1.27-1.16 (m, 6H), 0.79 (t, *J* = 10 Hz, 3H). <sup>13</sup>C NMR (125 MHz, CDCl<sub>3</sub>, ppm): δ 173.3, 161.9, 155.6, 153.1, 152.9, 140.6, 134.4, 133.6, 131.8, 127.9, 127.0, 126.9, 126.7, 126.0, 121.8, 118.0, 116.5, 115.8, 109.1, 107.2, 85.5, 61.1, 56.5, 41.0, 31.8, 27.2, 23.2, 22.5, 14.1. HRMS (ESI<sup>+</sup>): *m/z* calcd. for C<sub>32</sub>H<sub>34</sub>N<sub>2</sub>NaO<sub>6</sub> [M+Na]<sup>+</sup> : 565.2309 found : 565.2304.

**6-(2-(furan-2-yl)-4-oxo-4H-chromen-3-yl)-4-methyl-4-vinyl-1H-benzo[d][1,3]oxazin-2(4H)-one (5a)**

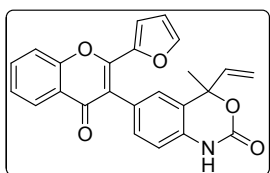

Yield: 90% as brown solid, mp 97-99 °C; <sup>1</sup>H NMR (500 MHz, CDCl<sub>3</sub>, ppm): δ 8.75 (s, 1H, D<sub>2</sub>O exchangeable), 8.19 (d, *J* = 7.5 Hz, 1H), 7.65 (t, *J* = 8 Hz, 1H), 7.61 (m, 2H), 7.48 (d, *J* = 8.5 Hz, 2H), 7.38 (t, *J* = 7.5 Hz, 1H), 7.12 (d, *J* = 2.5 Hz, 1H), 6.78 (s, 1H), 6.59 (s, 1H), 6.04-5.96 (m, 1H), 5.24-5.05 (m, 2H), 1.81 (s, 3H). <sup>13</sup>C NMR (100 MHz, CDCl<sub>3</sub>, ppm): δ 178.0, 155.9, 155.3, 145.9, 139.4, 138.7, 133.9, 132.2, 129.3, 127.4, 125.8, 125.3, 124.5, 123.5, 118.0, 116.5, 115.7, 114.7, 113.3, 112.7, 105.57, 84.2. FTIR (KBr, ν = cm<sup>-1</sup>): 3290, 2987, 1712, 1677, 1652, 1635, 1586, 1422, 1352. HRMS (ESI<sup>+</sup>): *m/z* calcd. for C<sub>24</sub>H<sub>17</sub>NNaO<sub>5</sub> [M+Na]<sup>+</sup> : 422.0998 found : 422.0995.

**4-allyl-6-(2-(furan-2-yl)-4-oxo-4H-chromen-3-yl)-4-methyl-1H-benzo[d][1,3]oxazin-2(4H)-one (5b)**

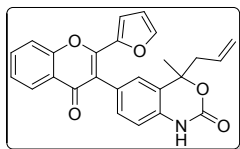

Yield: 91% as brown solid, mp 95-97 °C; <sup>1</sup>H NMR (500 MHz, CDCl<sub>3</sub>, ppm): δ 9.82 (s, 1H, D<sub>2</sub>O exchangeable), 8.17 (d, *J* = 8 Hz, 1H), 7.76 (s, 1H), 7.65 (t, *J* = 7.5 Hz, 1H), 7.59 (s, 1H), 7.47 (d, *J* = 8.5 Hz, 1H), 7.37 (t, *J* = 7 Hz, 1H), 7.30 (d, *J* = 8.5 Hz, 1H), 7.16 (s, 1H), 7.12 (d, *J* = 8.5 Hz, 1H), 6.80 (d, *J* = 8 Hz, 1H), 5.73-5.65 (m, 1H), 5.13-5.08 (m, 2H), 2.66-2.62 (m, 2H), 1.66 (s, 3H). <sup>13</sup>C NMR (125 MHz, CDCl<sub>3</sub>, ppm): δ 178.2, 156.0, 155.5, 152.5, 146.5, 146.1, 134.0, 132.0, 131.2, 127.1, 126.6, 125.9, 125.4, 124.3, 121.8, 120.5, 118.1, 116.5, 115.7, 113.4, 112.8, 105.5, 84.3, 45.6, 26.3. FTIR (KBr, ν = cm<sup>-1</sup>): 3284, 1713, 1697, 1609, 1556, 1372, 1303, 1236. HRMS (ESI<sup>+</sup>): *m/z* calcd. for C<sub>25</sub>H<sub>19</sub>NNaO<sub>5</sub> [M+Na]<sup>+</sup> : 436.1155 found : 436.1161.

**6-(2-(furan-2-yl)-4-oxo-4H-chromen-3-yl)-4-methyl-4-pentyl-1H-benzo[d][1,3]oxazin-2(4H)-one (5c)**

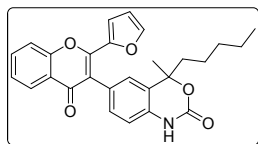

Yield: 92% as brown solid, mp 96-99 °C; <sup>1</sup>H NMR (500 MHz, CDCl<sub>3</sub>, ppm): δ 9.69 (s, 1H, D<sub>2</sub>O exchangeable), 8.17 (d, *J* = 6.5 Hz, 1H), 7.64-7.59 (m, 2H), 7.46 (d, *J* = 7.5 Hz, 1H), 7.36 (t, *J* = 8 Hz, 1H), 7.29 (d, *J* = 7 Hz, 1H), 7.12 (d, *J* = 20 Hz, 2H), 6.79 (d, *J* = 8 Hz, 1H), 6.58 (s, 1H), 1.91-1.86 (m, 2H), 1.64 (s, 3H), 1.37-1.23 (m, 6H), 0.82 (t, *J* = 8 Hz, 3H). <sup>13</sup>C NMR (125 MHz, CDCl<sub>3</sub>, ppm): δ 178.0, 155.9, 155.4, 152.8, 146.4, 146.0, 133.9, 133.7, 131.7, 127.0, 126.9, 125.8, 125.3, 124.2, 118.0, 116.5, 115.7, 113.3, 112.6, 105.5, 85.4, 41.0, 31.8, 27.1, 23.2, 22.5, 14.1. HRMS (ESI<sup>+</sup>): *m/z* calcd. for C<sub>27</sub>H<sub>25</sub>NNaO<sub>5</sub> [M+Na]<sup>+</sup> : 466.1624 found : 466.1636.

**6-(2-(furan-2-yl)-4-oxo-1,4-dihydroquinolin-3-yl)-4-methyl-4-vinyl-1H-benzo[d][1,3]oxazin-2(4H)-one (6a)**

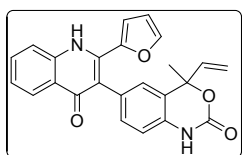

Yield: 89% as brown solid, mp 127-130 °C; <sup>1</sup>H NMR (500 MHz, CDCl<sub>3</sub>, ppm): δ 9.17 (s, 1H, D<sub>2</sub>O exchangeable), 8.75 (s, 1H, D<sub>2</sub>O exchangeable), 8.19 (d, *J* = 9 Hz, 1H), 7.66 (t, *J* = 7.5 Hz, 1H), 7.61 (m, 2H), 7.48 (d, *J* = 8.5 Hz, 2H), 7.38 (t, *J* = 7.5 Hz, 1H), 7.12 (d, *J* = 2.5 Hz, 1H), 6.78 (s, 1H), 6.59 (s, 1H), 6.04-5.96 (m, 1H), 5.24-5.05 (m, 2H), 1.81 (s, 3H). <sup>13</sup>C NMR (100 MHz, CDCl<sub>3</sub>, ppm): δ 178.1, 155.8, 155.3, 145.9, 139.4, 138.7, 133.9, 132.2, 129.3, 127.4, 125.8, 125.3, 124.5, 123.5, 118.0, 116.5, 115.7, 114.7, 113.3, 112.7, 105.57, 84.2. FTIR (KBr, ν = cm<sup>-1</sup>): 3486, 3229, 2869, 1717, 1693, 1645, 1546, 1462, 1341, 1259. HRMS (ESI<sup>+</sup>): *m/z* calcd. for C<sub>24</sub>H<sub>18</sub>N<sub>2</sub>NaO<sub>4</sub> [M+Na]<sup>+</sup> : 421.1158 found : 421.1152.

**4-allyl-6-(2-(furan-2-yl)-4-oxo-1,4-dihydroquinolin-3-yl)-4-methyl-1H-benzo[d][1,3]oxazin-2(4H)-one (6b)**

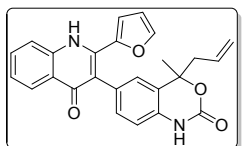

Yield: 87% as brown solid, mp 146-148 °C; <sup>1</sup>H NMR (400 MHz, CDCl<sub>3</sub>, ppm): δ 9.90 (s, 1H, D<sub>2</sub>O exchangeable), 8.17 (dd, *J* = 2, 10 Hz, 1H), 7.67-7.63 (m, 1H), 7.59 (d, *J* = 1 Hz, 1H), 7.47 (d, *J* = 10 Hz, 1H), 7.39-7.35 (m, 1H), 7.30-7.27 (m, 1H), 7.15 (d, *J* = 2.5 Hz, 1H), 7.11 (d, *J* = 4.5 Hz, 1H), 6.80 (d, *J* = 10.5 Hz, 1H), 6.59-6.57 (m, 1H), 6.24 (s, 1H, D<sub>2</sub>O exchangeable), 5.73-5.63 (m, 1H), 5.12-5.07 (m, 2H), 2.69-2.58 (m, 2H), 1.66 (s, 3H). <sup>13</sup>C NMR (125 MHz, CDCl<sub>3</sub>, ppm): δ 178.2, 156.1, 155.4, 152.5, 146.5, 146.1, 134.0, 132.0, 131.2, 127.1, 126.6, 125.9, 125.4, 124.3, 121.8, 120.5, 118.1, 116.5, 115.7, 113.4, 112.8, 105.5, 84.3, 45.6, 26.3. FTIR (KBr, ν = cm<sup>-1</sup>): 3492, 3278, 2849, 1715, 1689, 1665, 1609, 1565, 1412, 1343, 1259. HRMS (ESI<sup>+</sup>): *m/z* calcd. for C<sub>25</sub>H<sub>20</sub>N<sub>2</sub>NaO<sub>4</sub> [M+Na]<sup>+</sup> : 435.1315 found : 435.1314.

**6-(2-(furan-2-yl)-4-oxo-1,4-dihydroquinolin-3-yl)-4-methyl-4-pentyl-1H-benzo[d][1,3]oxazin-2(4H)-one (6c)**

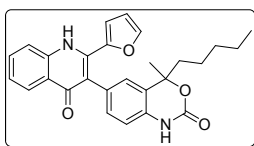

Yield: 91% as brown solid, mp 153-157 °C; <sup>1</sup>H NMR (500 MHz, CDCl<sub>3</sub>, ppm): δ 9.69 (s, 1H, D<sub>2</sub>O exchangeable), 8.17 (d, *J* = 6.5 Hz, 1H), 7.64-7.59 (m, 2H), 7.46 (d, *J* = 7.5 Hz, 1H), 7.36 (t, *J* = 8 Hz, 1H), 7.29 (d, *J* = 7 Hz, 1H), 7.12 (d, *J* = 20 Hz, 2H), 6.79 (d, *J* = 8 Hz, 1H), 6.58 (s, 1H), 4.23 (s, 1H, D<sub>2</sub>O exchangeable), 1.91-1.86 (m, 2H), 1.64 (s, 3H), 1.37-1.23 (m, 6H), 0.82 (t, *J* = 7 Hz, 3H). <sup>13</sup>C NMR (125 MHz, CDCl<sub>3</sub>, ppm): δ 178.0, 155.9, 155.4, 152.8, 146.4, 146.0, 133.9, 133.7, 131.8, 127.1, 126.9, 125.8, 125.3, 124.3, 118.0, 116.5, 115.7, 113.3, 112.7, 105.5, 85.4, 41.0, 31.8, 27.2, 23.2, 22.5, 14.1. HRMS (ESI<sup>+</sup>): *m/z* calcd. for C<sub>27</sub>H<sub>26</sub>N<sub>2</sub>NaO<sub>4</sub> [M+Na]<sup>+</sup> : 465.1784 found : 465.1781.

**6-(3-bromo-5-fluorophenyl)-4-methyl-4-vinyl-1H-benzo[d][1,3]oxazin-2(4H)-one (6aa)**

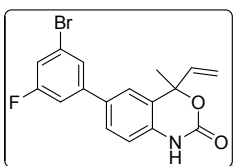

Yield: 94% as white solid; <sup>1</sup>H NMR (500 MHz, CDCl<sub>3</sub>, ppm): δ 8.53 (s, 1H, D<sub>2</sub>O exchangeable), 7.46 (s, 2H), 7.28 (s, 1H), 7.22 (d, *J* = 8 Hz, 1H), 7.16 (d, *J* = 9.5 Hz, 1H), 6.93 (d, *J* = 8.5 Hz, 1H), 6.08 (dd, *J* = 10.5, 17 Hz, 1H), 5.28 (d, *J* = 11 Hz, 1H), 5.16 (d, *J* = 17 Hz, 1H), 1.25 (s, 3H). <sup>13</sup>C NMR (100 MHz, CDCl<sub>3</sub>, ppm): δ 164.4, 161.9, 153.0, 144.0, 134.7, 134.1, 131.4, 128.0, 125.9, 125.3, 122.9, 120.5, 118.0, 115.5, 113.1, 85.1, 26.6. FTIR (KBr, ν = cm<sup>-1</sup>): 3142, 2912, 1701, 1656. HRMS (ESI<sup>+</sup>): *m/z* calcd for C<sub>17</sub>H<sub>14</sub>BrFNO<sub>2</sub> [M+H]<sup>+</sup>: 362.0192 found: 362.0189.

**4-allyl-6-(3-bromo-5-fluorophenyl)-4-methyl-1H-benzo[d][1,3]oxazin-2(4H)-one (7aa)**

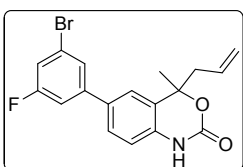

Yield: 94% as white solid; <sup>1</sup>H NMR (500 MHz, CDCl<sub>3</sub>, ppm): δ 9.52 (s, 1H, D<sub>2</sub>O exchangeable), 7.42 (t, *J* = 6.5 Hz, 2H), 7.21 (s, 2H), 7.15 (d, *J* = 9 Hz, 1H), 6.97 (d, *J* = 8.5 Hz, 1H), 5.80-5.72 (m, 1H), 5.17-5.14 (m, 2H), 2.81-2.71 (m, 2H), 1.78 (s, 3H). <sup>13</sup>C NMR (100 MHz, CDCl<sub>3</sub>, ppm): δ 164.5, 161.9, 153.2, 144.2, 134.9, 134.2, 131.6, 128.1, 126.0, 125.4, 123.3, 120.6, 118.1, 115.7, 113.2,



85.2, 45.9, 26.7. FTIR (KBr,  $\nu = \text{cm}^{-1}$ ): 3140, 2913, 1704, 1655, 1573, 1516, 1431, 1356, 1304, 1168, 823, 768. HRMS (ESI+):  $m/z$  calcd for  $\text{C}_{18}\text{H}_{15}\text{BrFNNaO}_2$   $[\text{M}+\text{Na}]^+$ : 398.0168 found: 398.0184.

**Reference:**

1. P. Zhang, P. Zhang, E. A. Terefenko, A. Fensome, J. Wrobel, R. Winneker, S. Lundeen, K. B. Marschke, Z. Zhang, *J. Med. Chem.* 2002, **45**, 4379.

# <sup>1</sup>H and <sup>13</sup>C Spectra

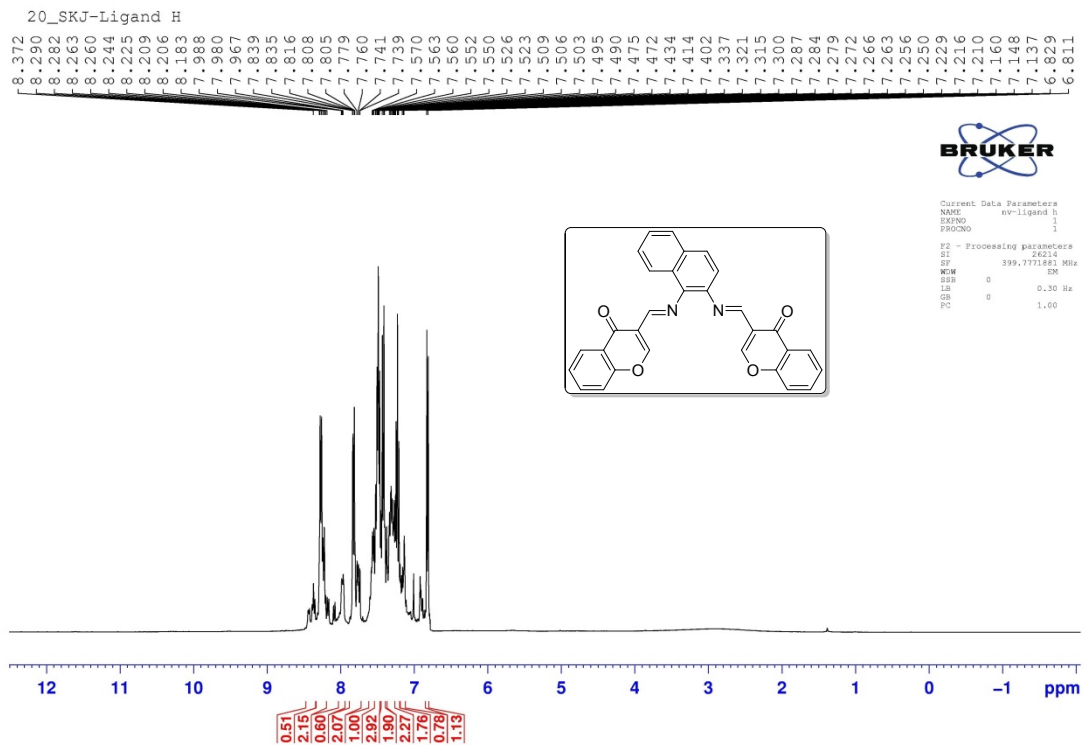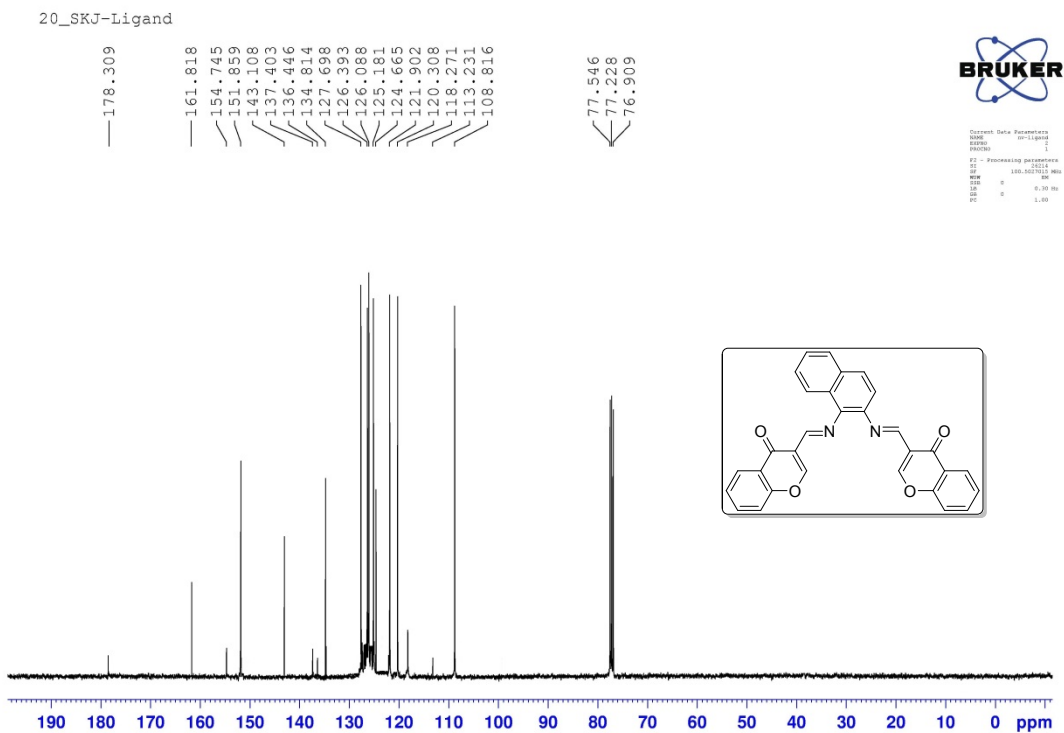



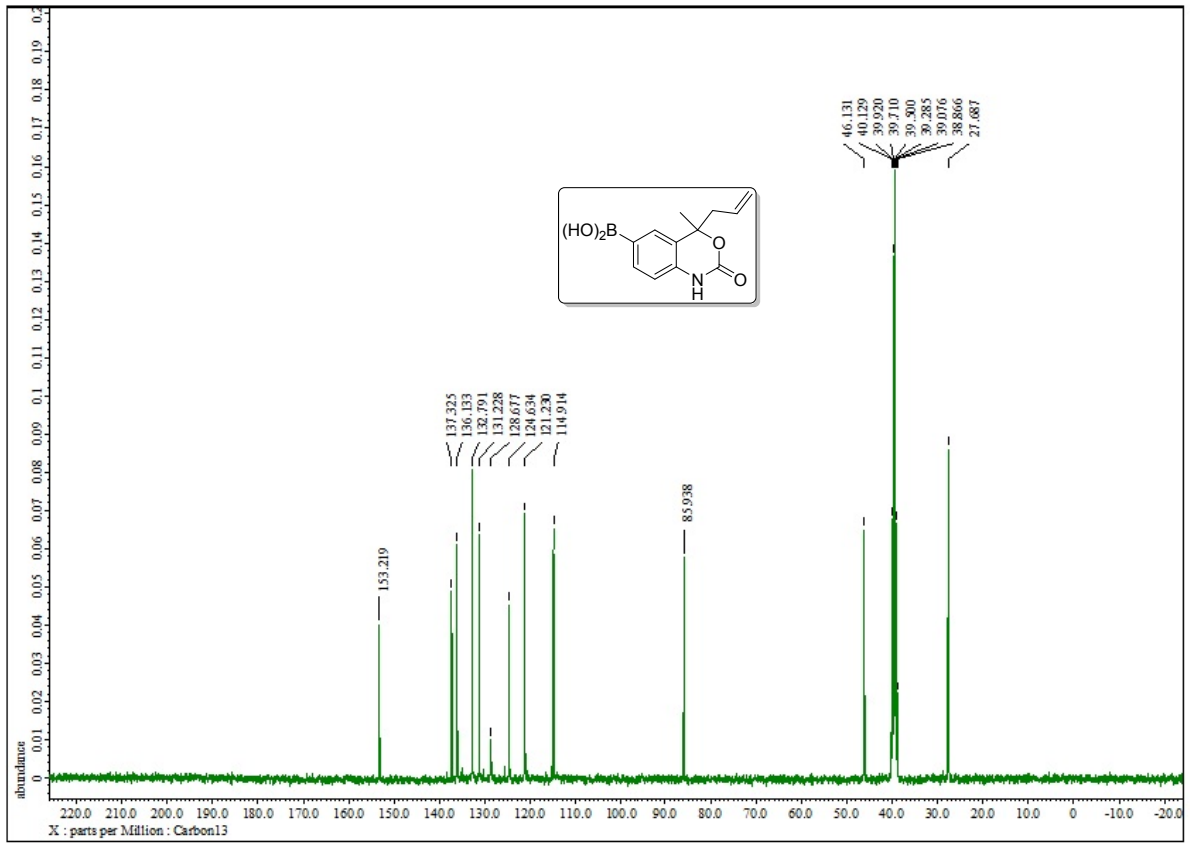

SKJ-3-22

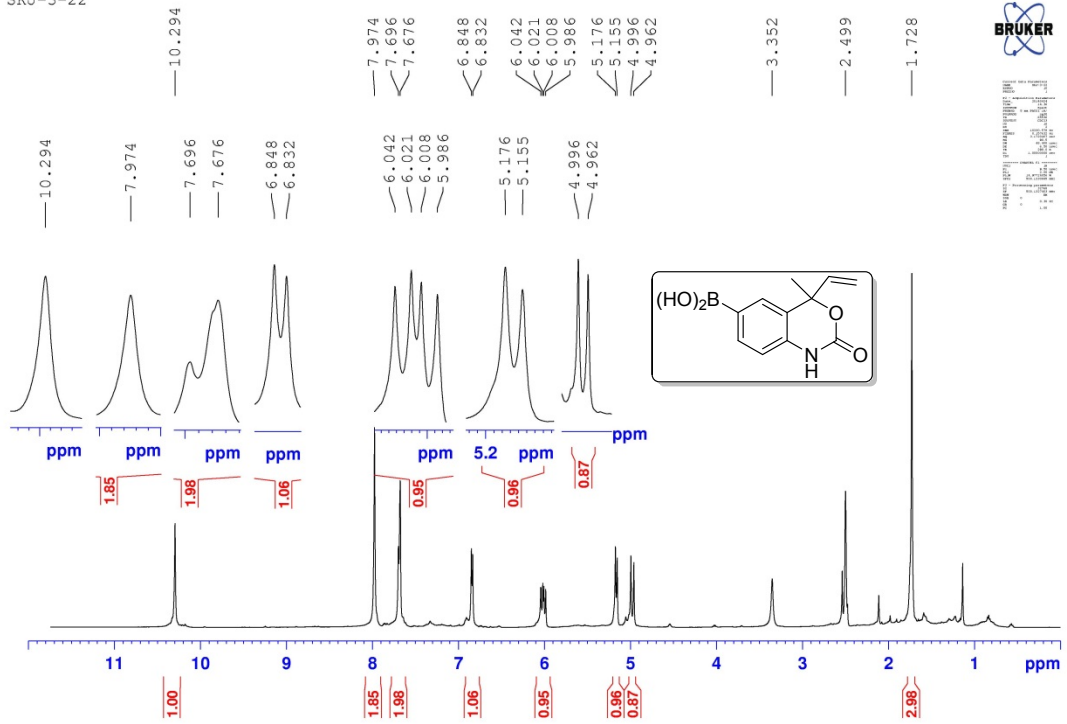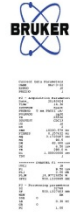

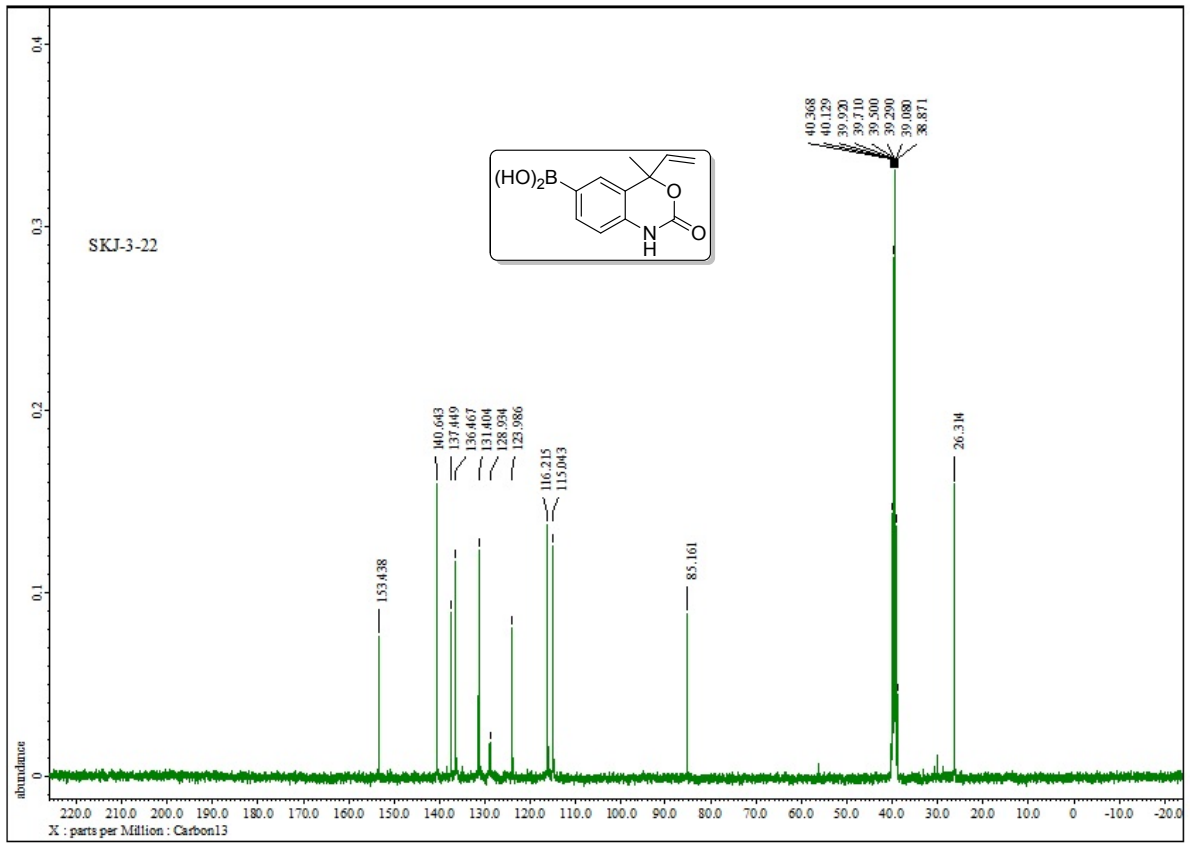

skj-3-23

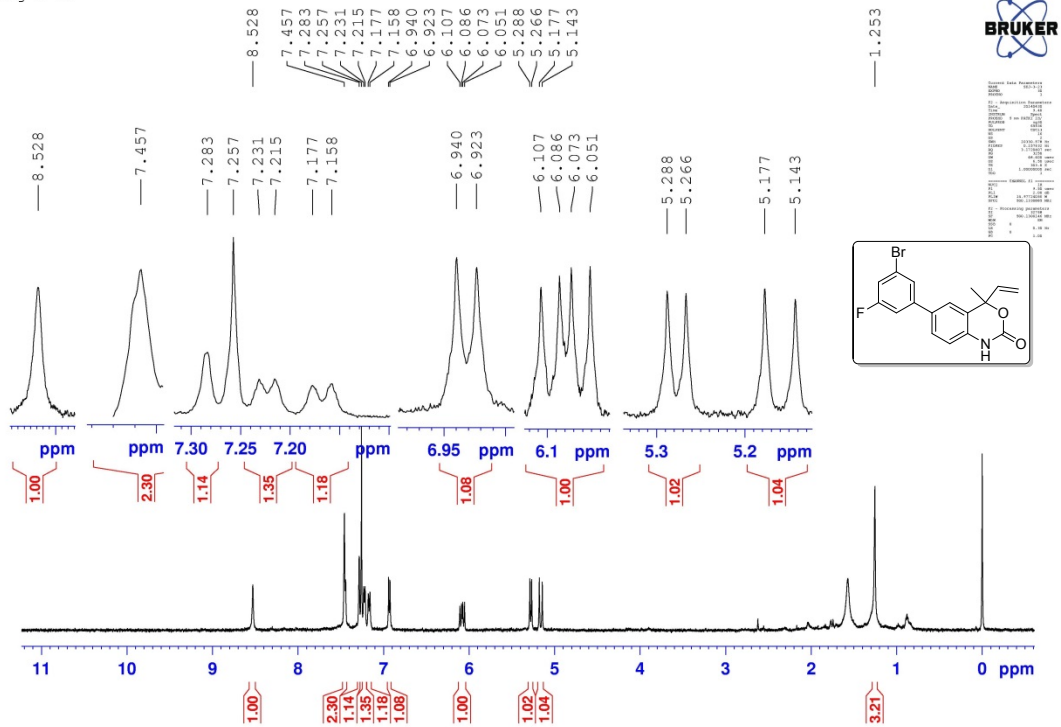

skj-6-4

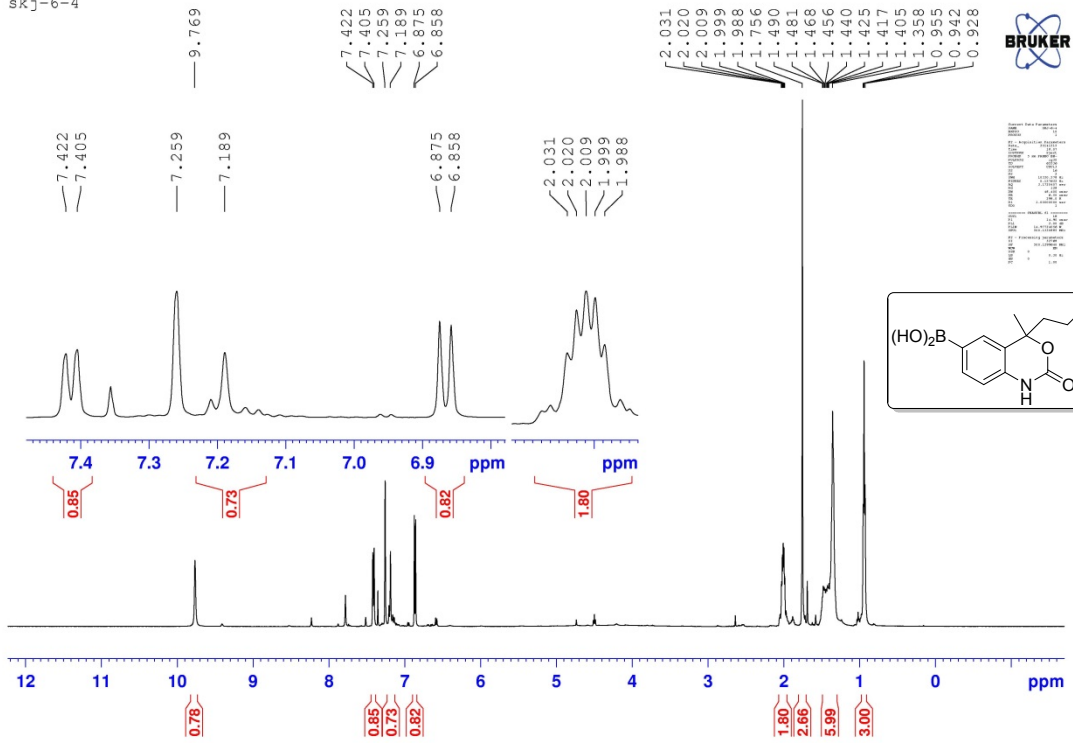

skj-6-4 c13

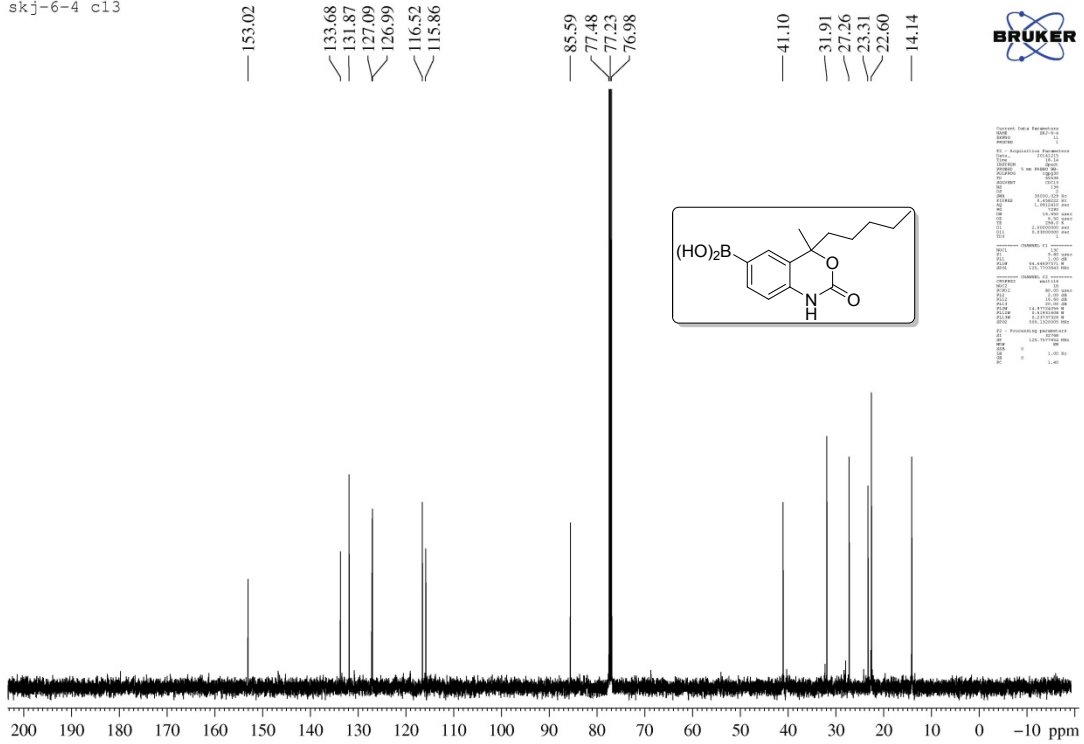

SKJ-6-44

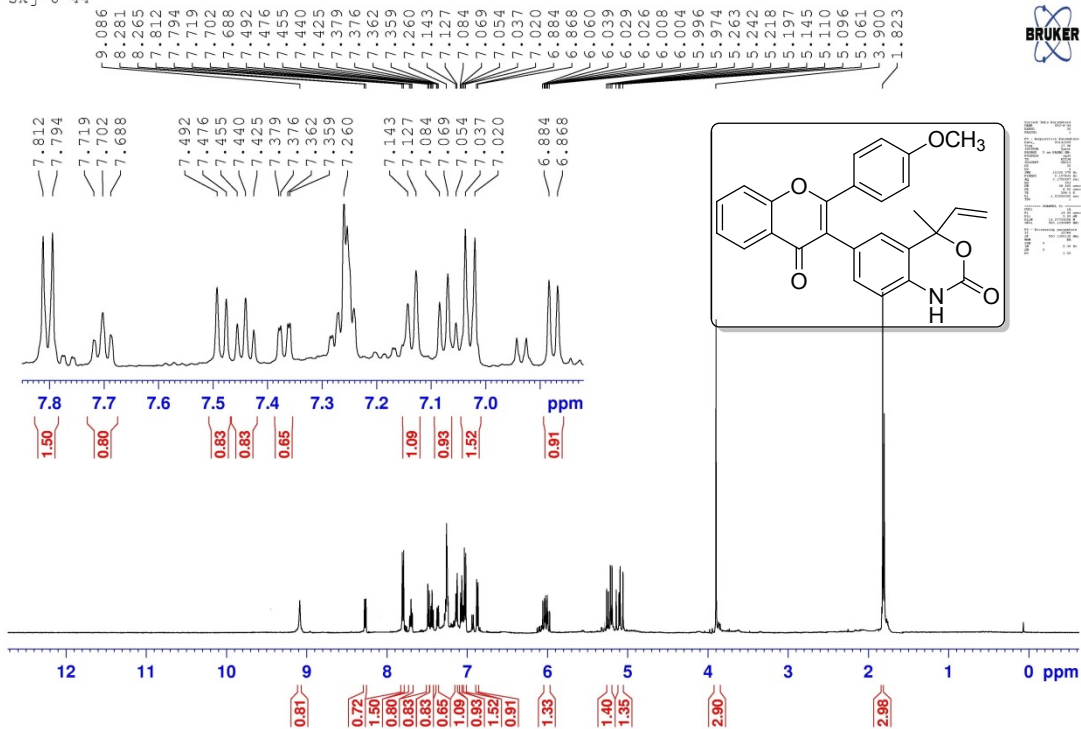

SKJ-6-44C13

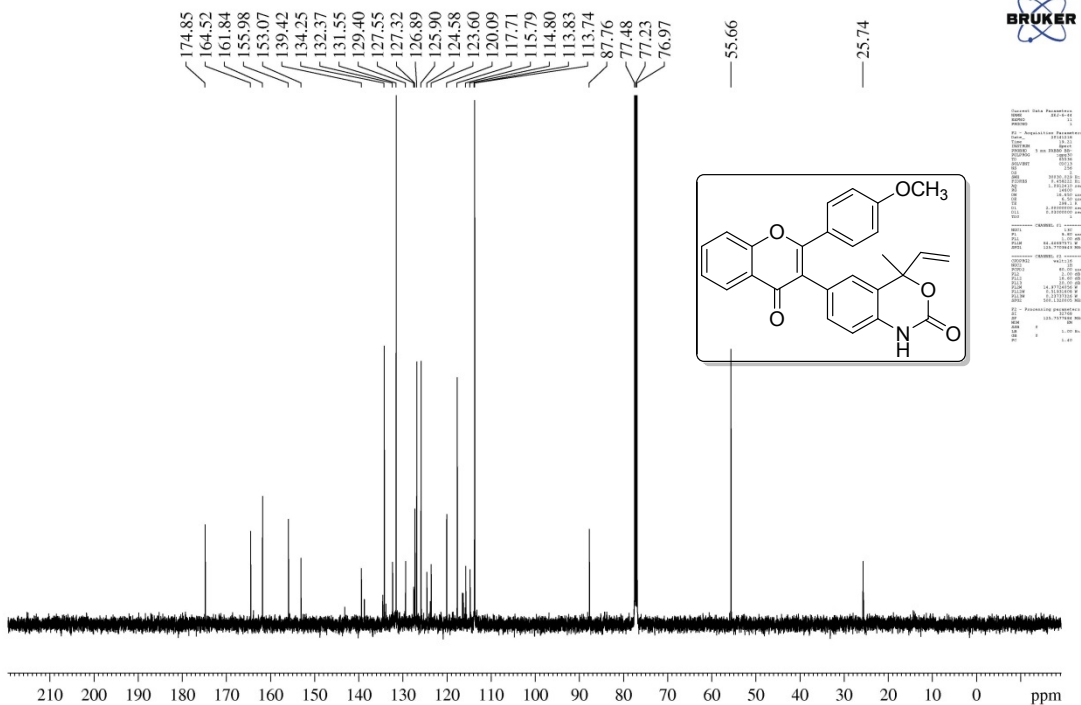





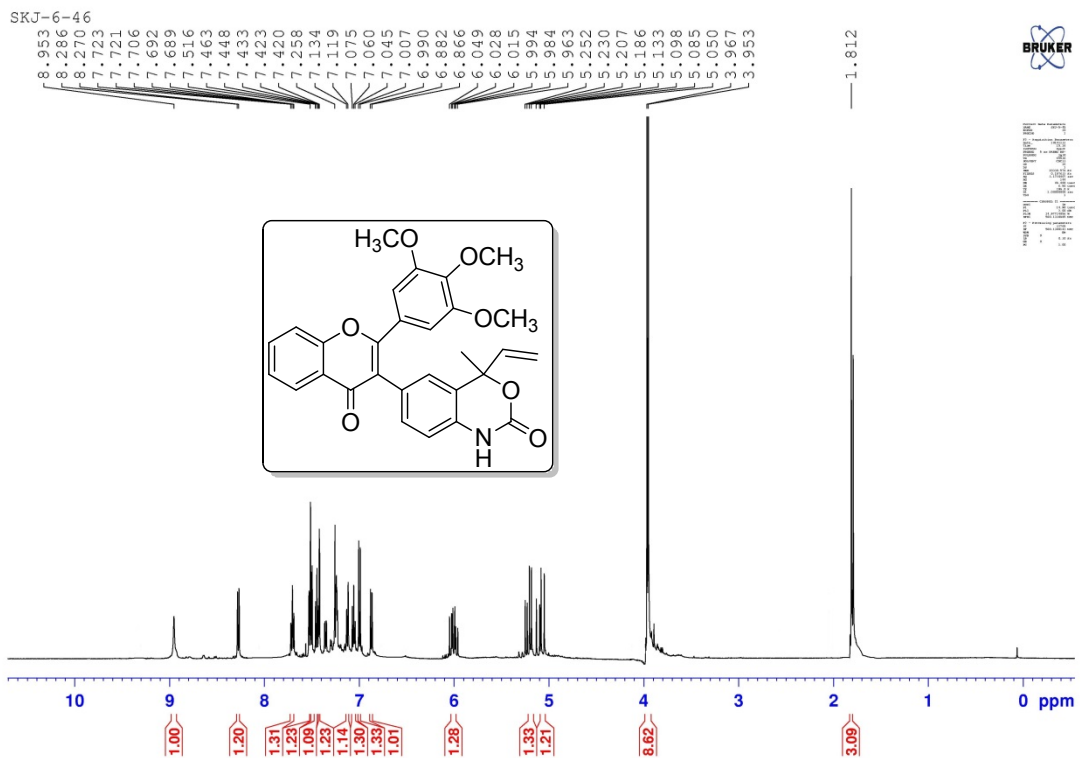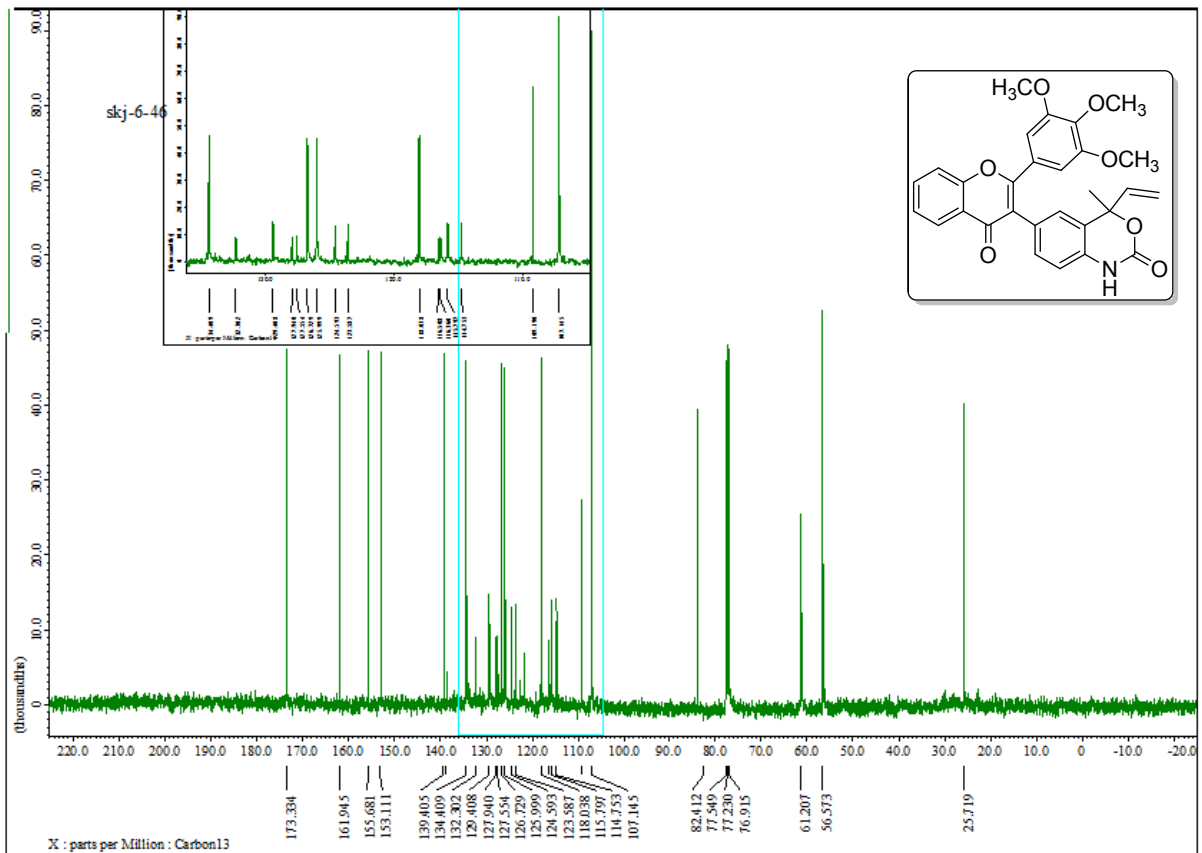

SKJ-6-29

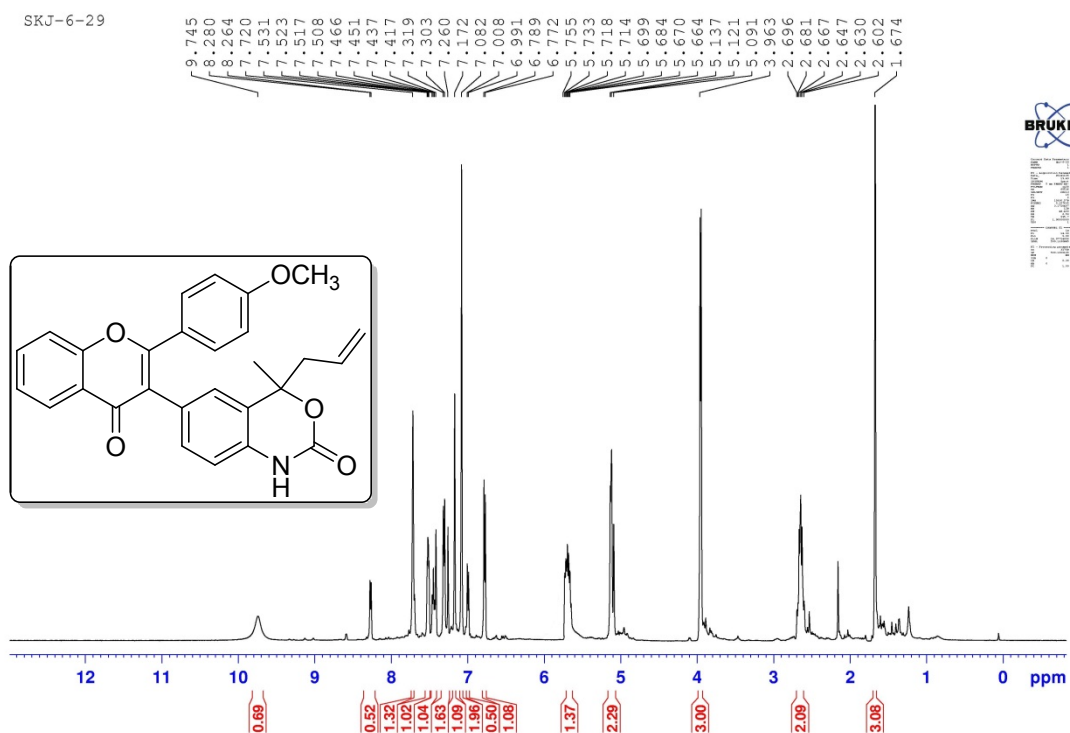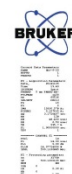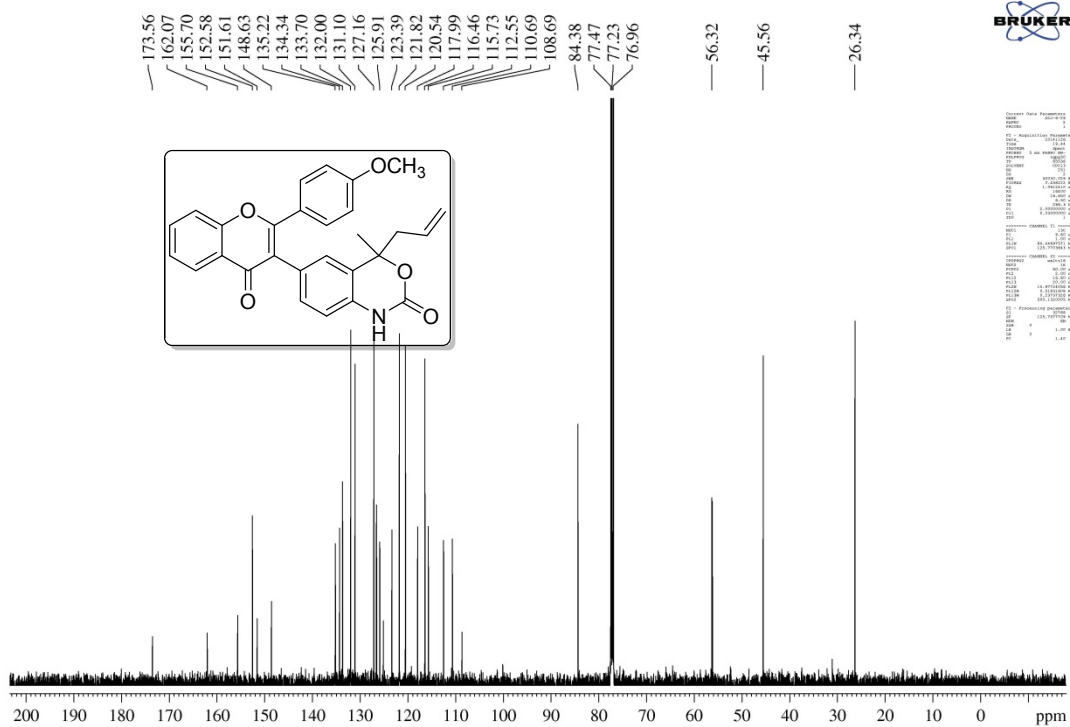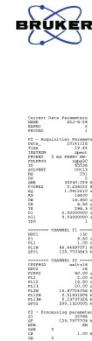



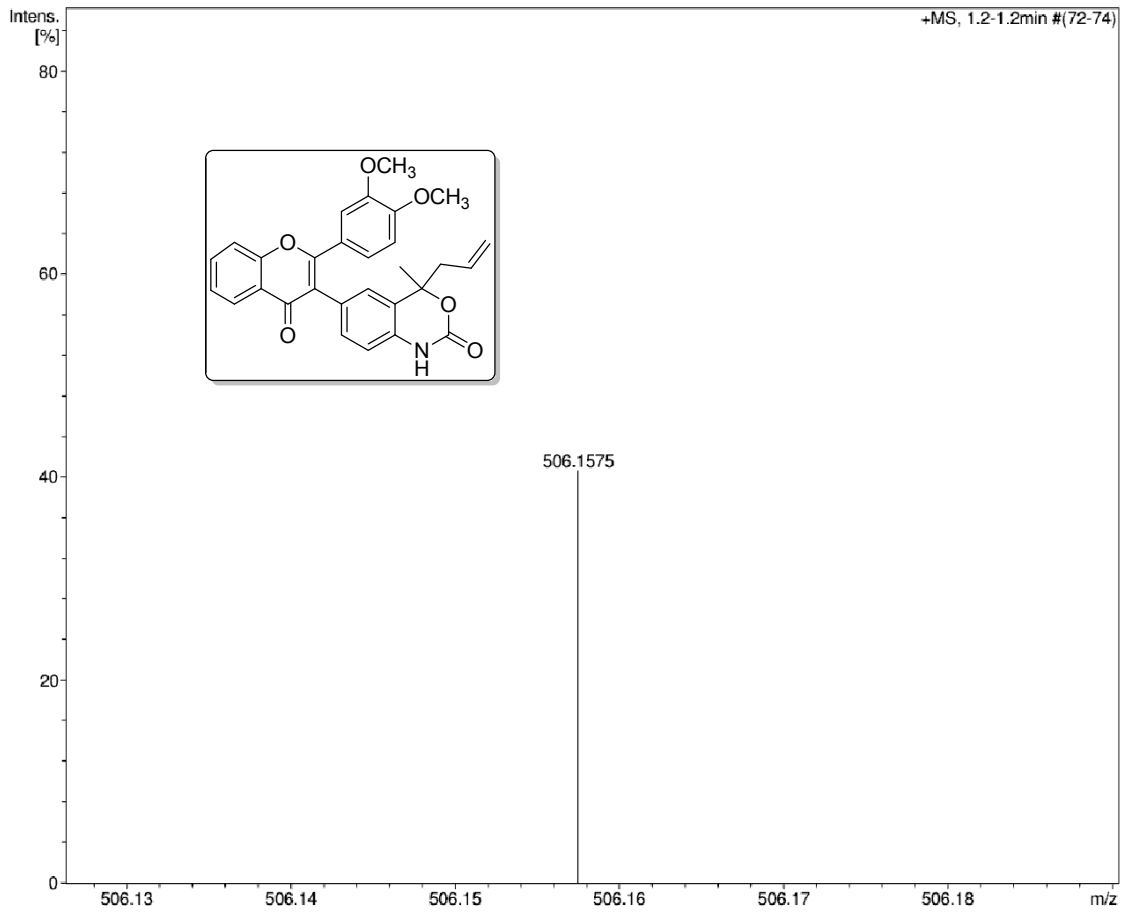

Bruker Compass DataAnalysis 4.0

printed: 8/10/2014 5:24:54 PM

Page 1 of 1

skj-6-31

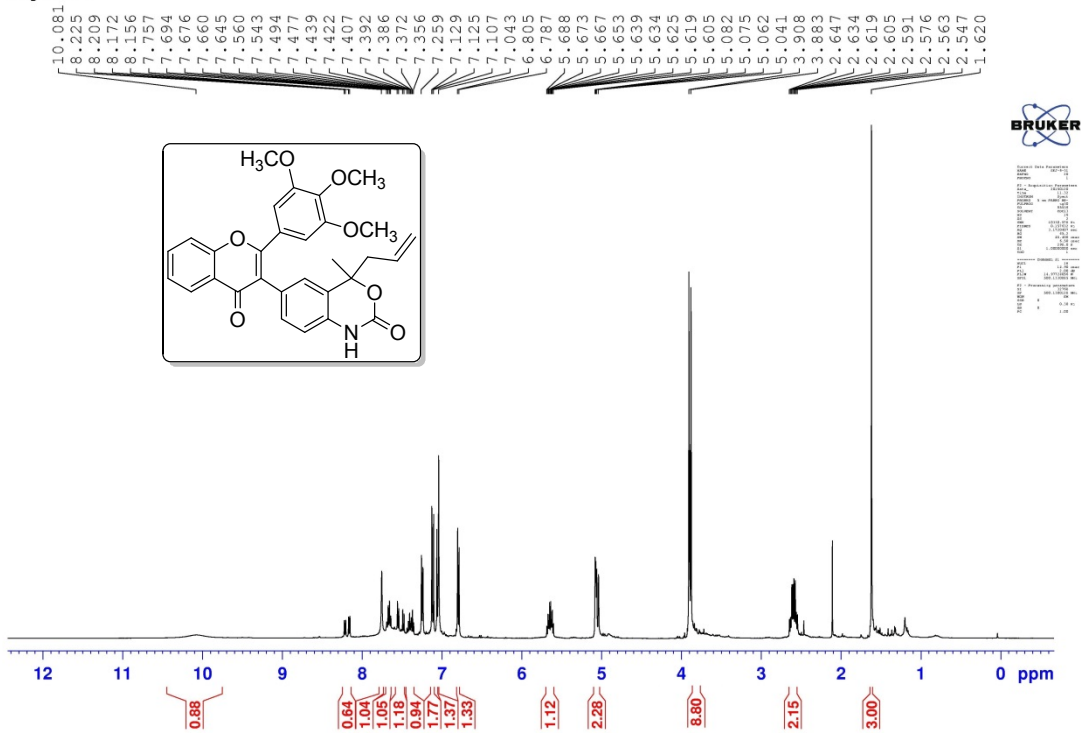

skj-6-31 c13

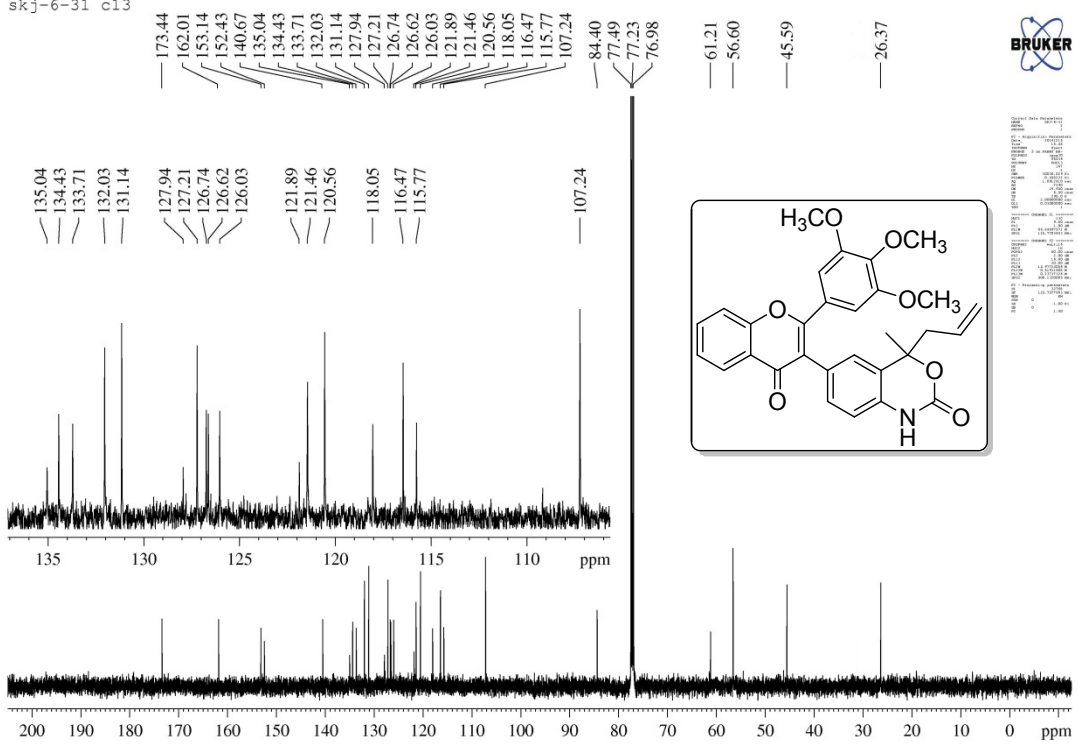

SKJ-6-16

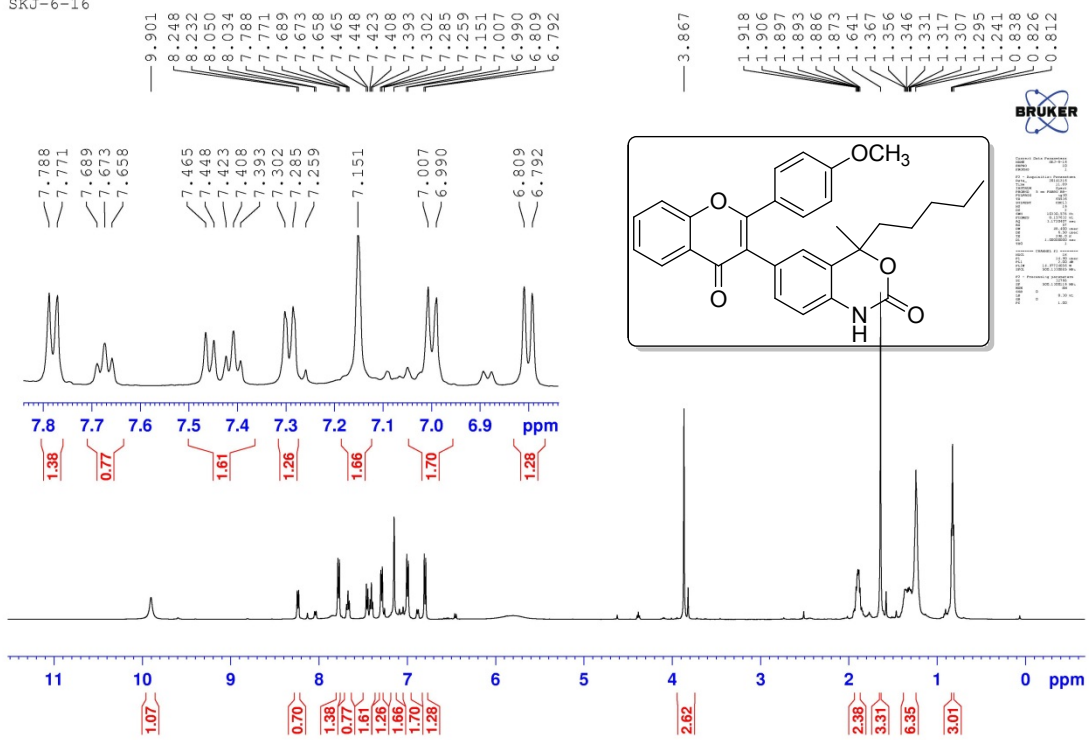

SKJ-6-16 C13

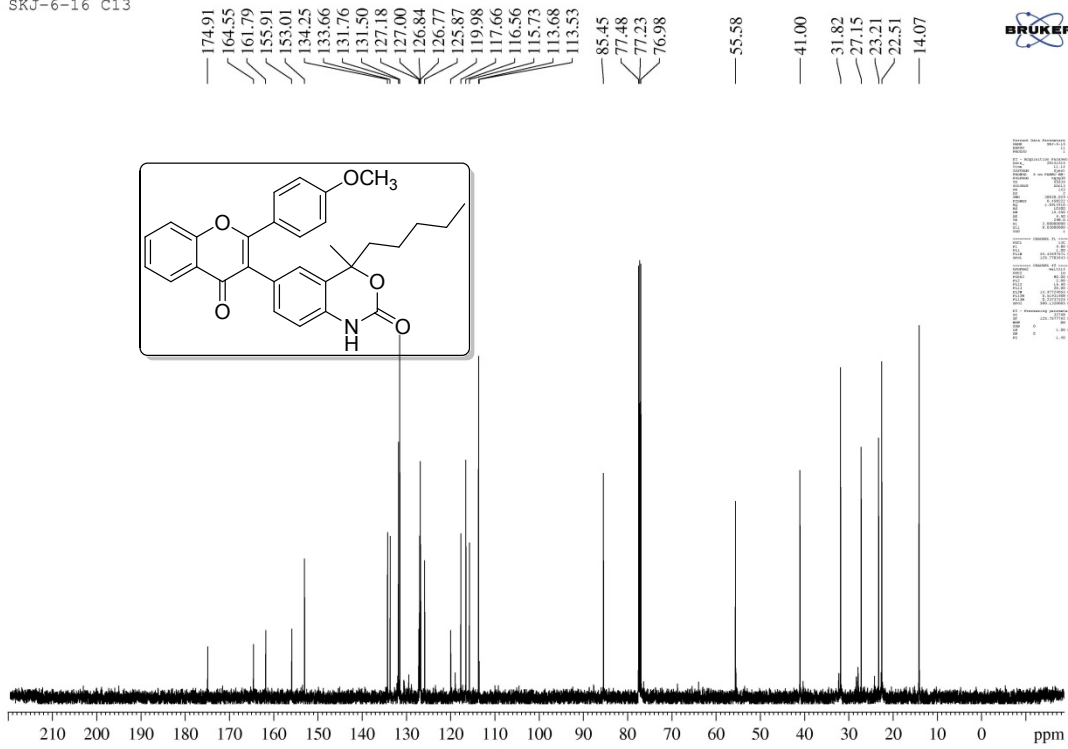

Current Data Parameters  
 Name: SKJ-6-16  
 Date: 2011-08-11  
 Time: 10:10:10  
 F2 - Acquisition Parameters  
 Date\_UTC: 20110811101010  
 Time: 10:10:10  
 F2 - Processing parameters  
 Date\_UTC: 20110811101010  
 Time: 10:10:10  
 F2 - Reference parameters  
 Name: SKJ-6-16  
 Date: 2011-08-11  
 Time: 10:10:10  
 F2 - Acquisition Parameters  
 Date\_UTC: 20110811101010  
 Time: 10:10:10  
 F2 - Processing parameters  
 Date\_UTC: 20110811101010  
 Time: 10:10:10  
 F2 - Reference parameters  
 Name: SKJ-6-16  
 Date: 2011-08-11  
 Time: 10:10:10

SKJ-6-18

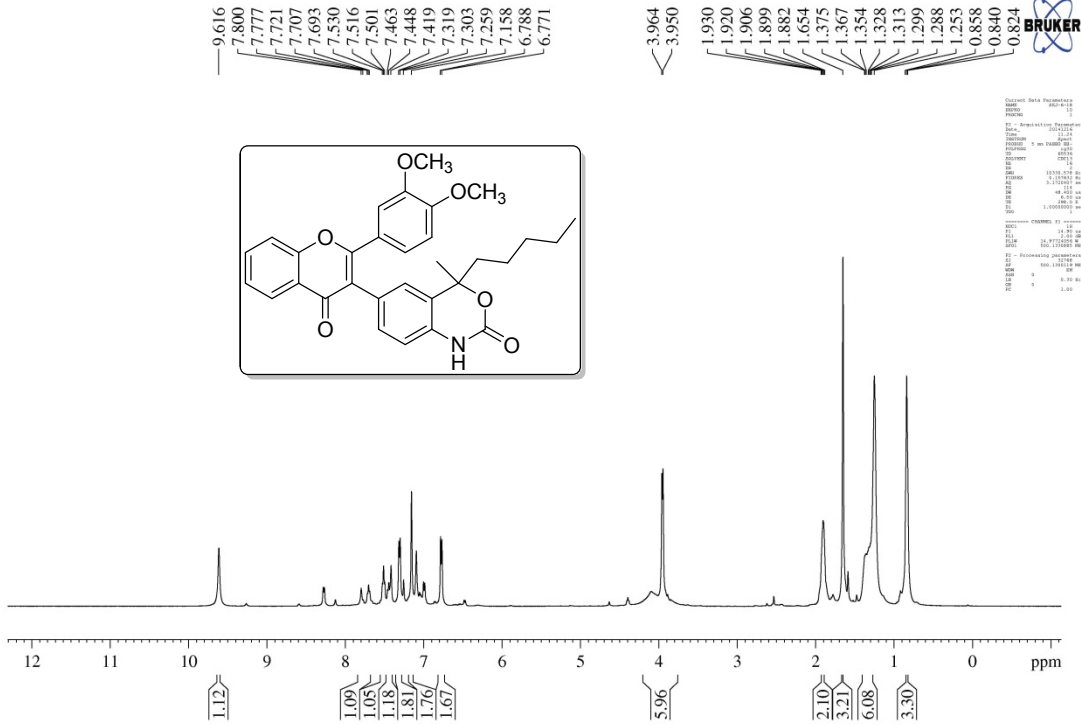

Current Data Parameters  
 Name: SKJ-6-18  
 Date: 2011-08-11  
 Time: 10:10:10  
 F2 - Acquisition Parameters  
 Date\_UTC: 20110811101010  
 Time: 10:10:10  
 F2 - Processing parameters  
 Date\_UTC: 20110811101010  
 Time: 10:10:10  
 F2 - Reference parameters  
 Name: SKJ-6-18  
 Date: 2011-08-11  
 Time: 10:10:10  
 F2 - Acquisition Parameters  
 Date\_UTC: 20110811101010  
 Time: 10:10:10  
 F2 - Processing parameters  
 Date\_UTC: 20110811101010  
 Time: 10:10:10  
 F2 - Reference parameters  
 Name: SKJ-6-18  
 Date: 2011-08-11  
 Time: 10:10:10



SKJ-6-49C13

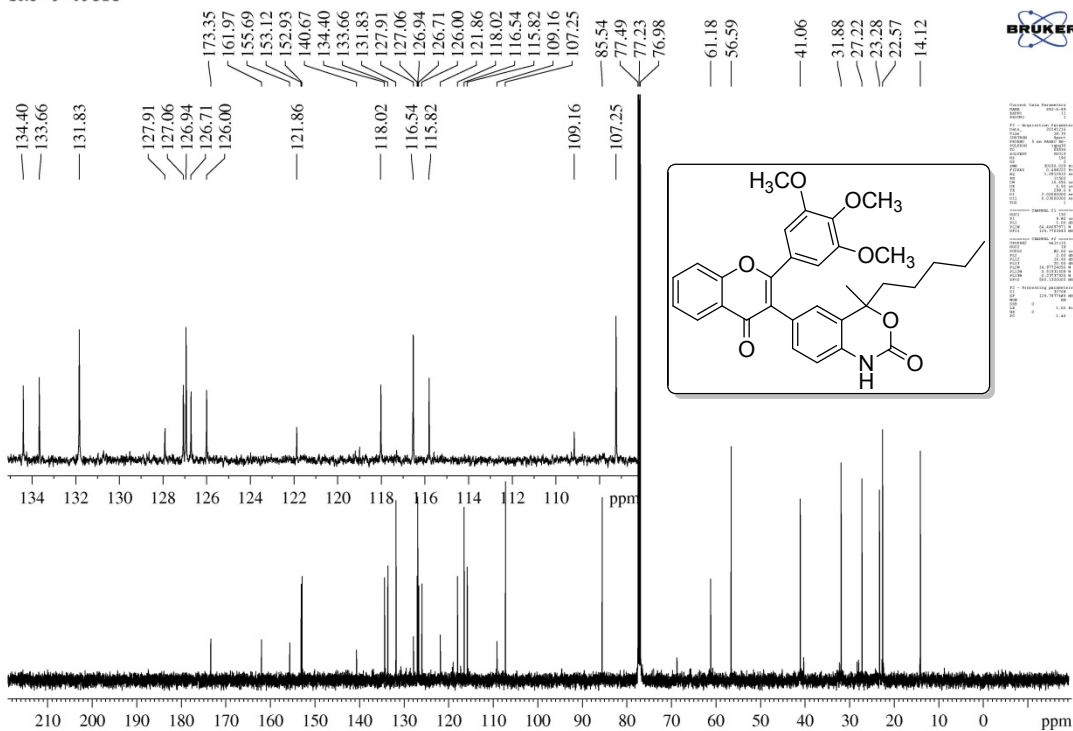

skj-6-39

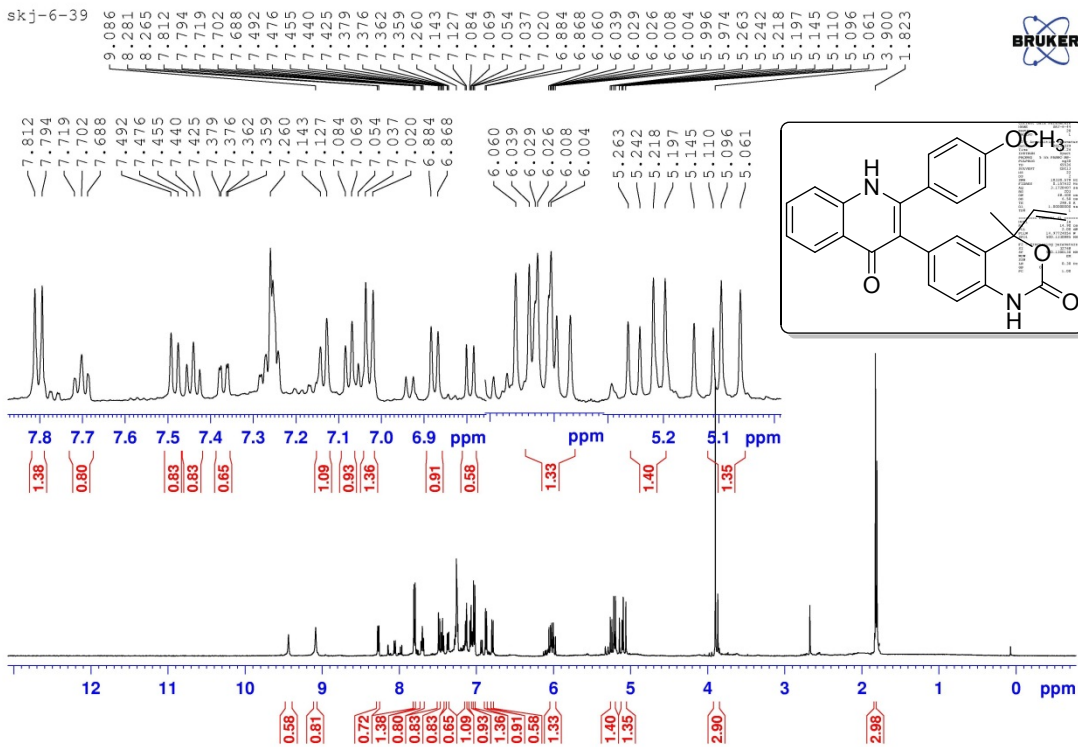



SKJ-6-39C13

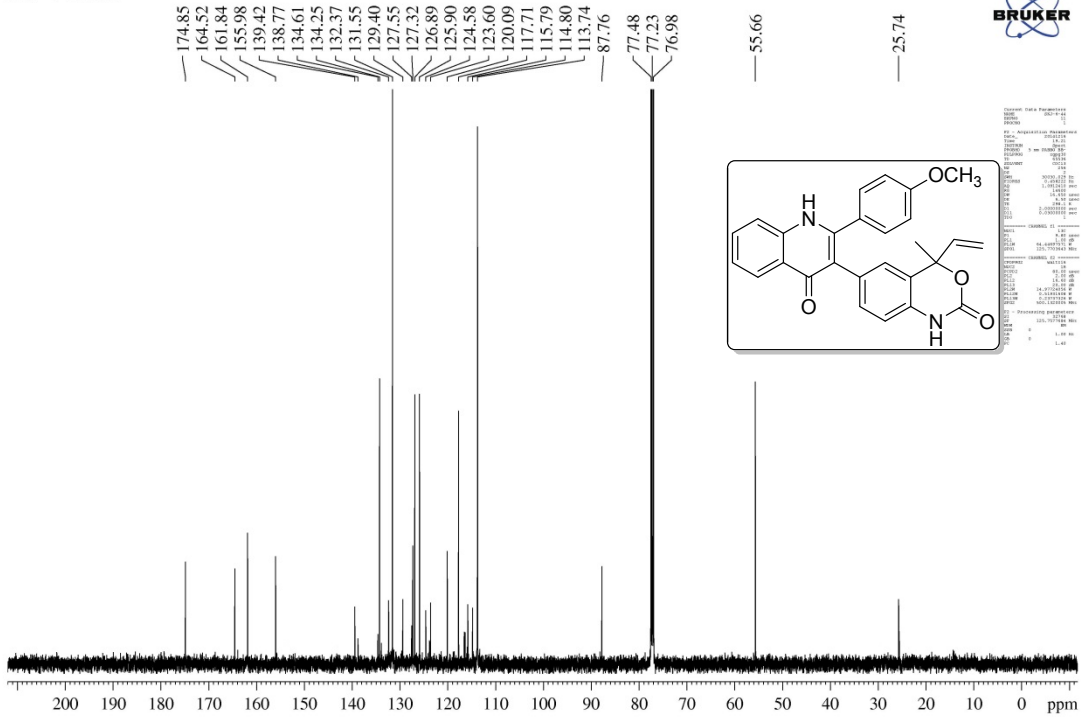

skj-6-40

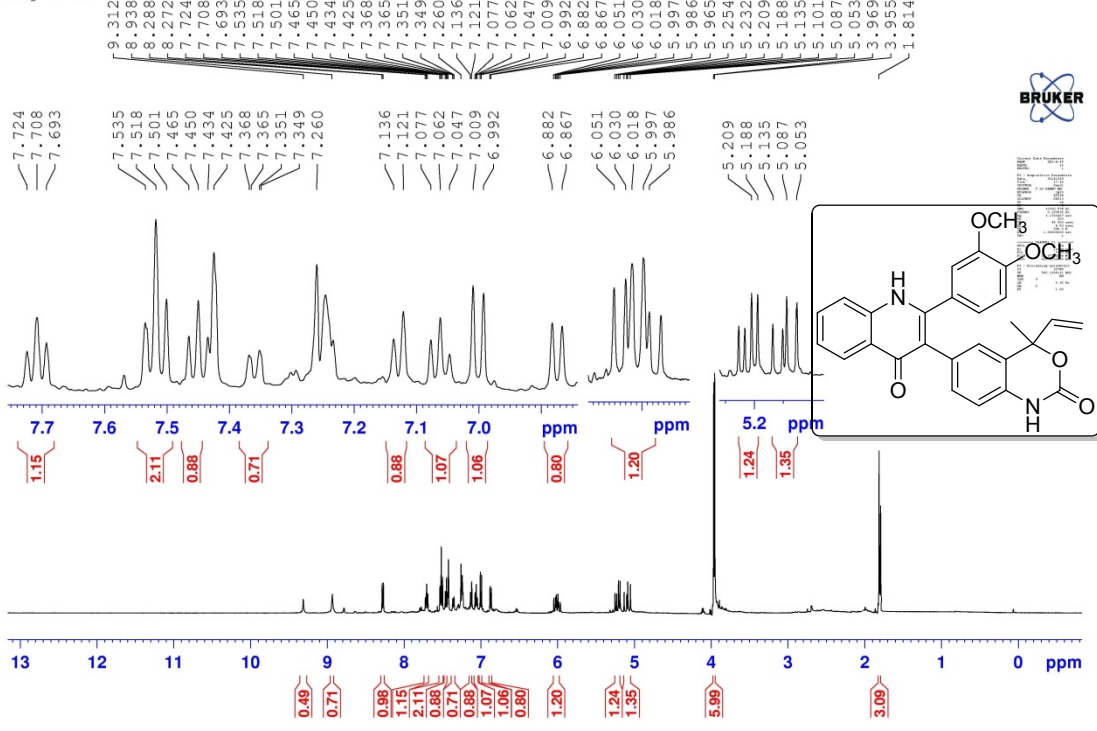









SKJ-6-52

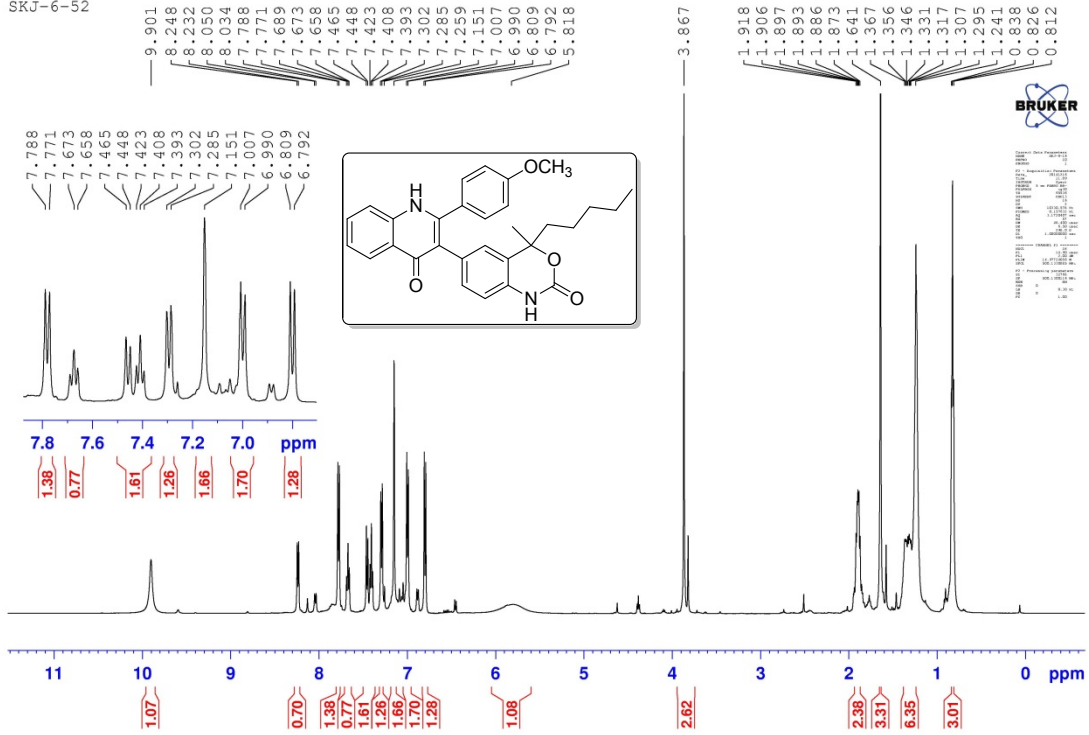

SKJ-6-52 C13

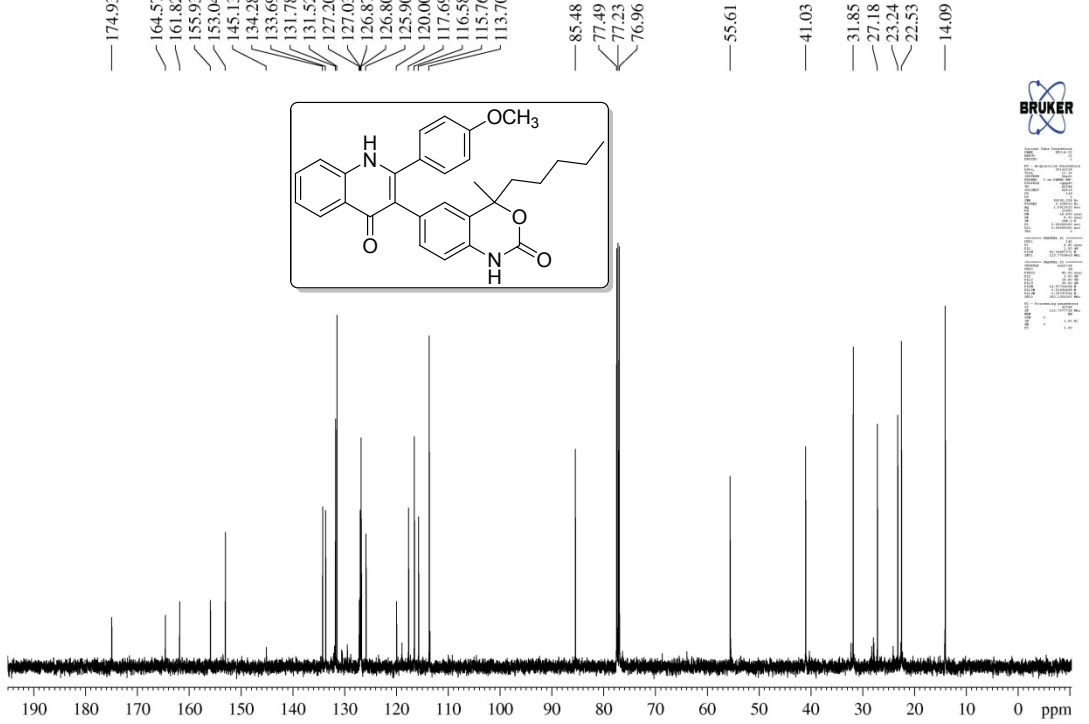

SKJ-6-53

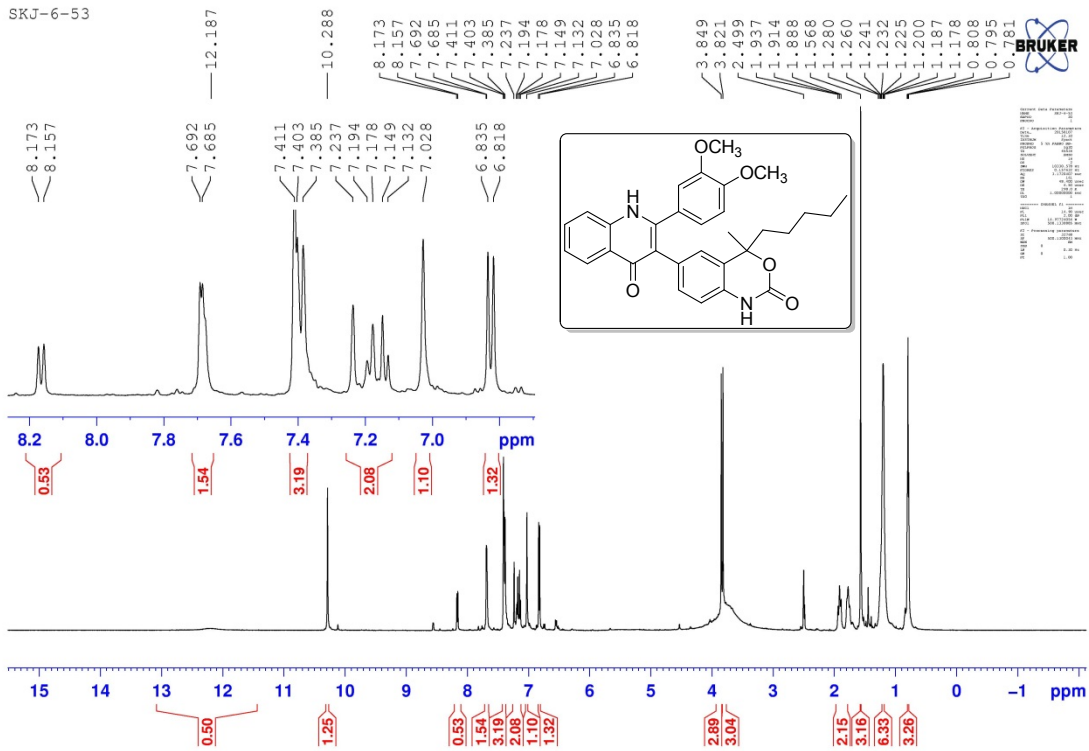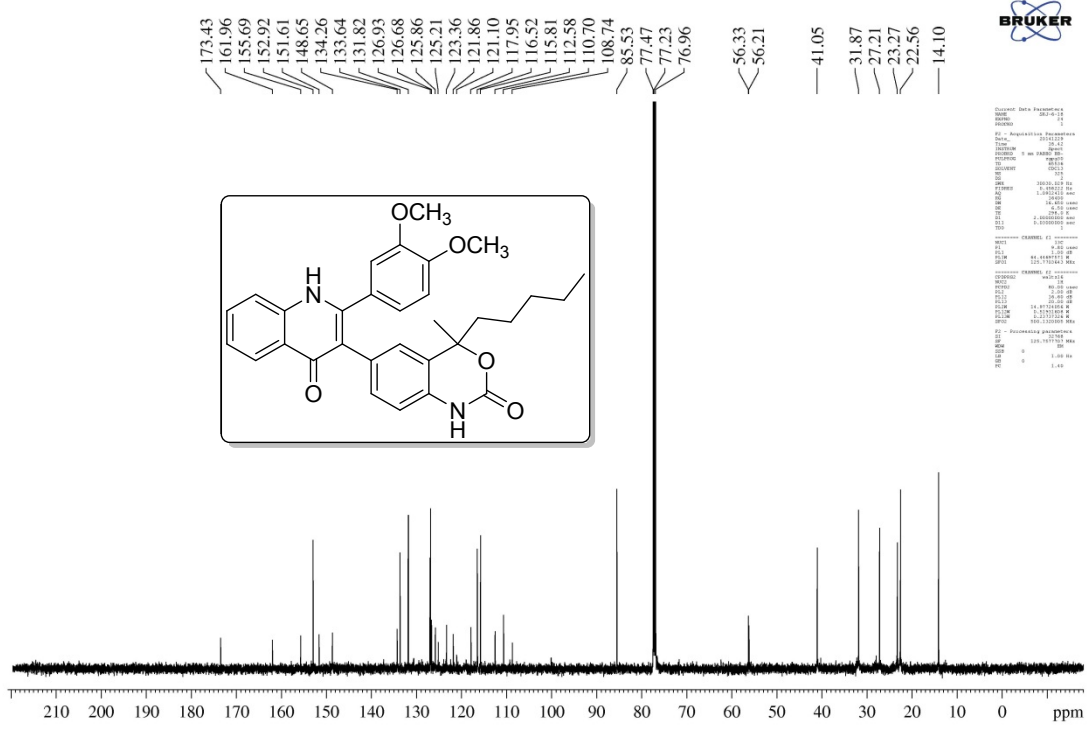

SKJ-6-54

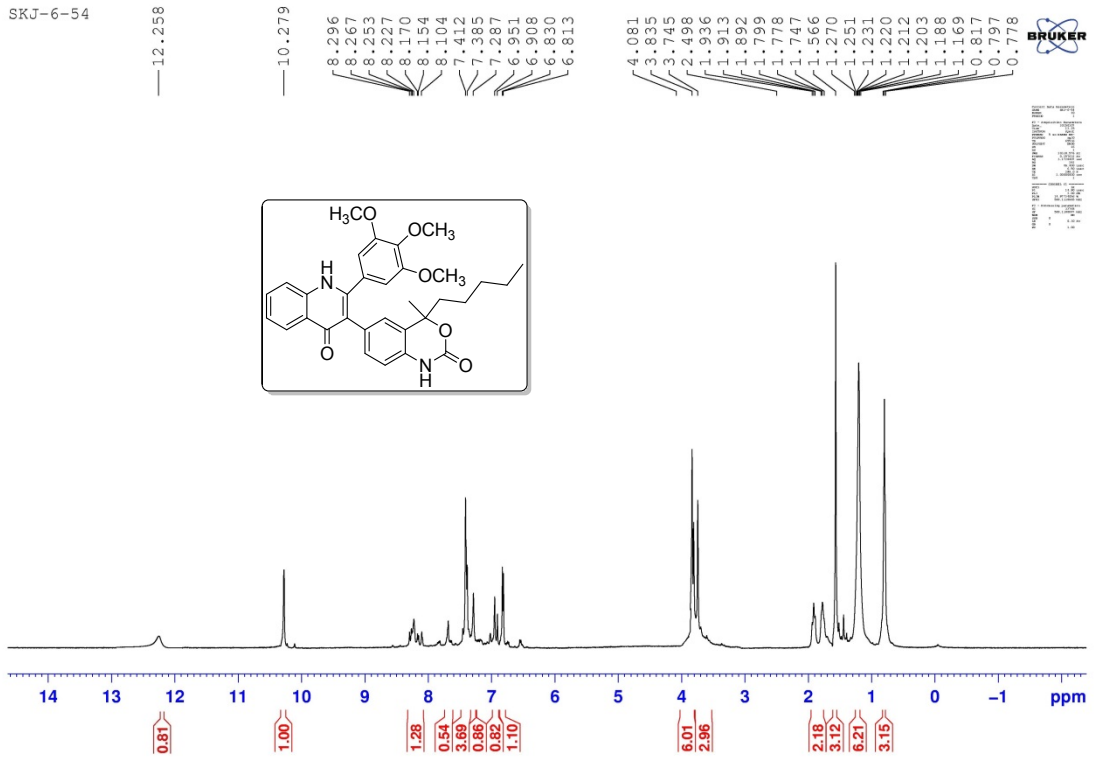

SKJ-6-54 C13

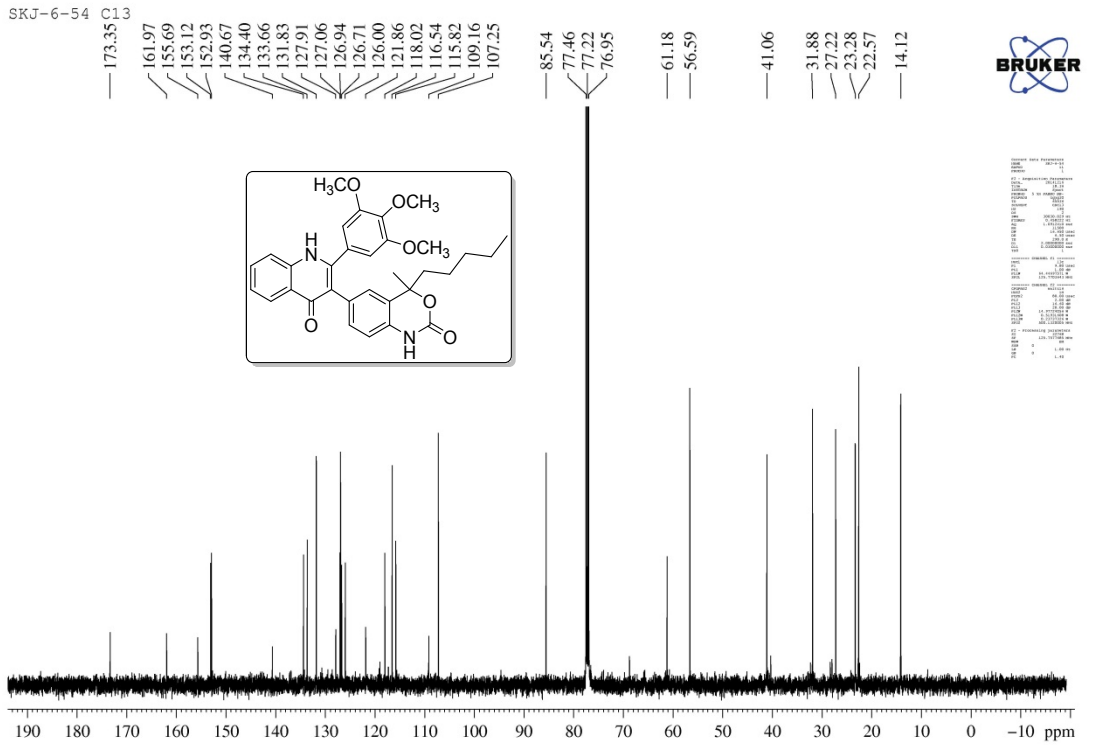



SKJ-6-47

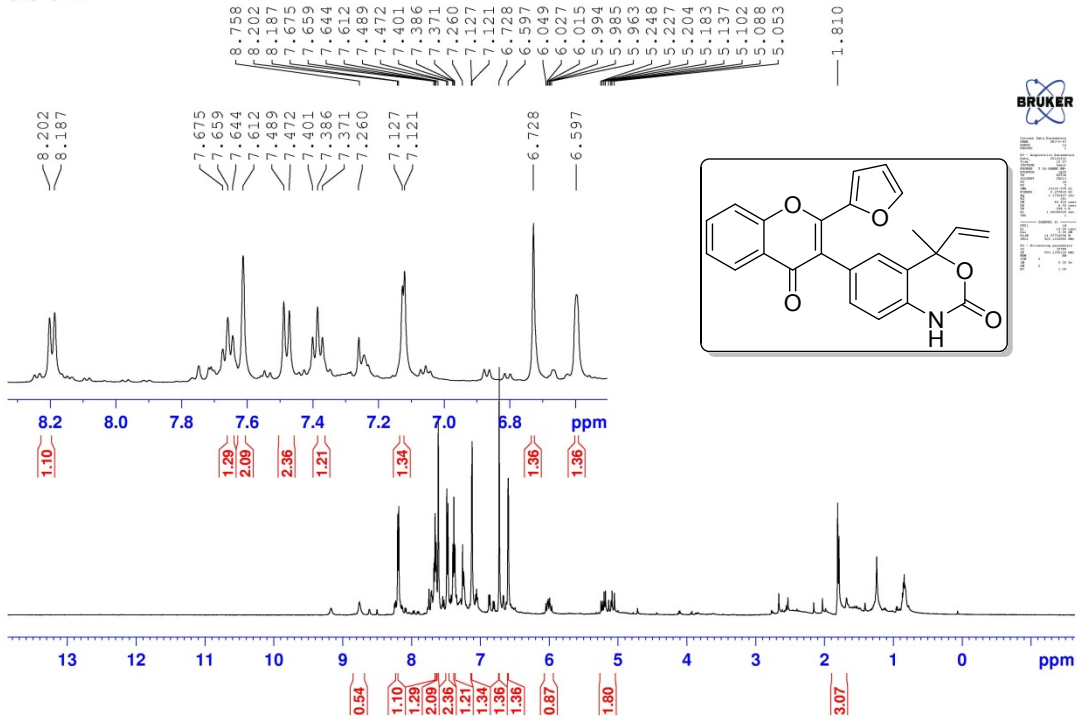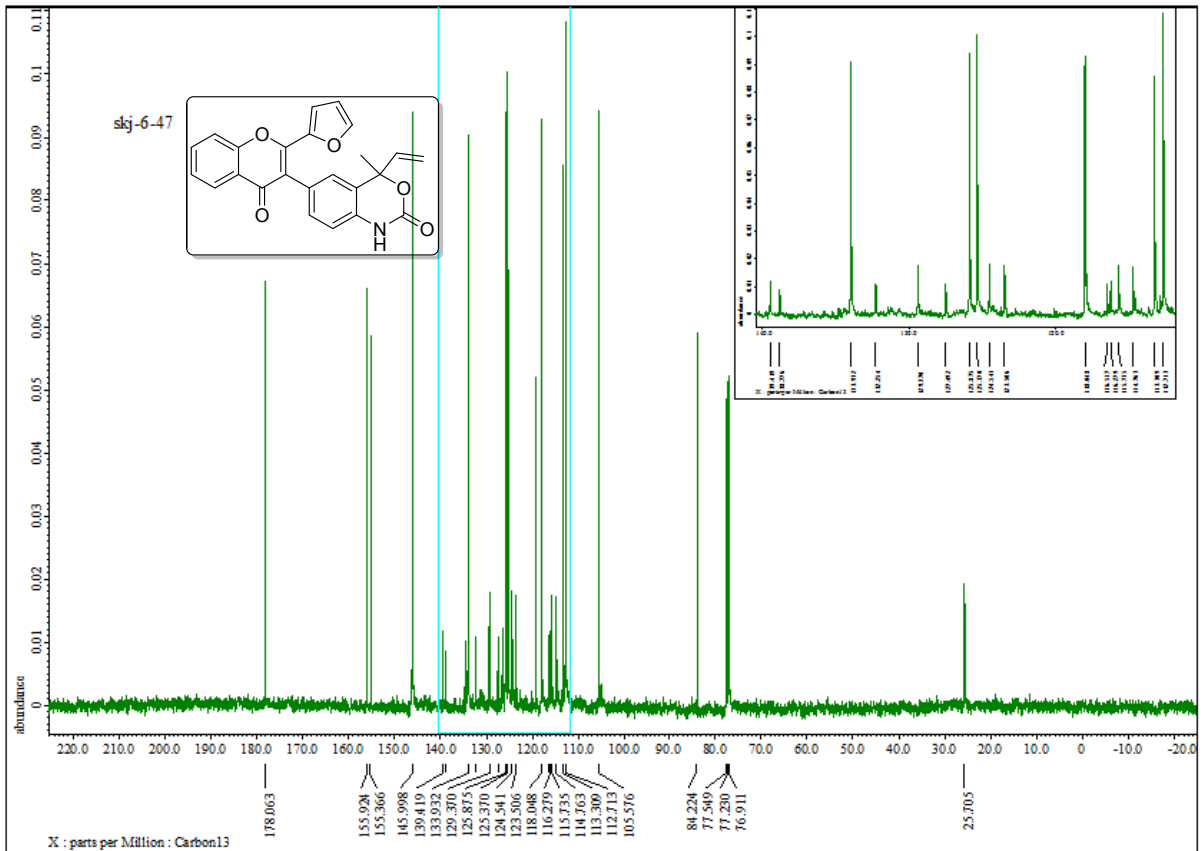

SKJ-6-32

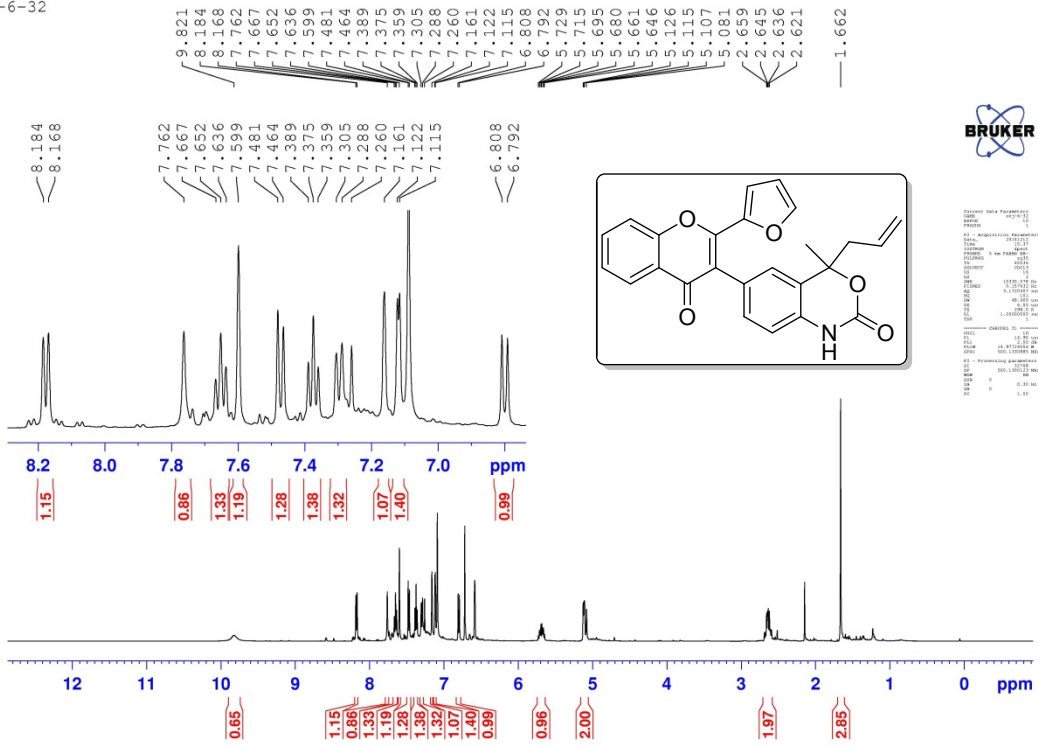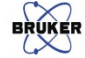

NAME: SKJ-6-32  
 EXPNO: 1  
 PROCNO: 1  
 F2 - Acquisition Parameters  
 Date\_UTC: 20150112 12:00:00  
 Time: 12:00:00  
 Date: 20150112  
 Time: 12:00:00  
 F2 - Processing parameters  
 Name: SKJ-6-32  
 Date\_UTC: 20150112 12:00:00  
 Time: 12:00:00  
 Date: 20150112  
 Time: 12:00:00  
 F2 - Reference parameters  
 Name: SKJ-6-32  
 Date\_UTC: 20150112 12:00:00  
 Time: 12:00:00  
 Date: 20150112  
 Time: 12:00:00  
 F2 - Acquisition parameters  
 Name: SKJ-6-32  
 Date\_UTC: 20150112 12:00:00  
 Time: 12:00:00  
 Date: 20150112  
 Time: 12:00:00  
 F2 - Processing parameters  
 Name: SKJ-6-32  
 Date\_UTC: 20150112 12:00:00  
 Time: 12:00:00  
 Date: 20150112  
 Time: 12:00:00  
 F2 - Reference parameters  
 Name: SKJ-6-32  
 Date\_UTC: 20150112 12:00:00  
 Time: 12:00:00  
 Date: 20150112  
 Time: 12:00:00

SKJ-6-32A

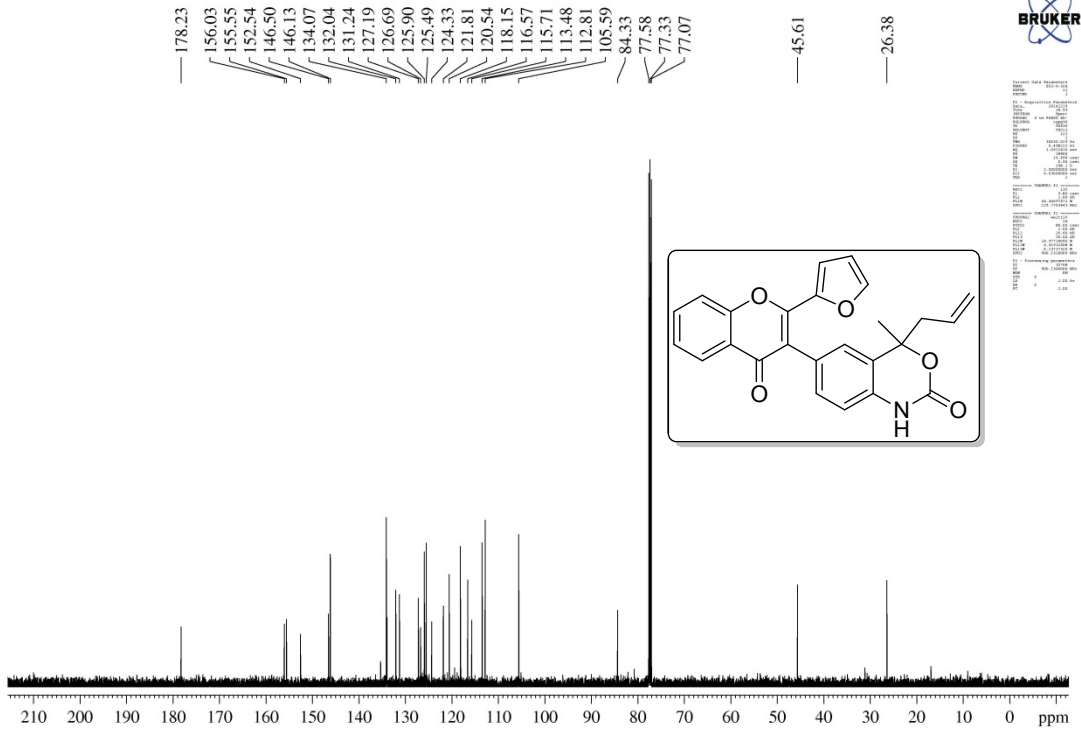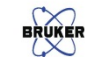

NAME: SKJ-6-32A  
 EXPNO: 1  
 PROCNO: 1  
 F2 - Acquisition Parameters  
 Date\_UTC: 20150112 12:00:00  
 Time: 12:00:00  
 Date: 20150112  
 Time: 12:00:00  
 F2 - Processing parameters  
 Name: SKJ-6-32A  
 Date\_UTC: 20150112 12:00:00  
 Time: 12:00:00  
 Date: 20150112  
 Time: 12:00:00  
 F2 - Reference parameters  
 Name: SKJ-6-32A  
 Date\_UTC: 20150112 12:00:00  
 Time: 12:00:00  
 Date: 20150112  
 Time: 12:00:00  
 F2 - Acquisition parameters  
 Name: SKJ-6-32A  
 Date\_UTC: 20150112 12:00:00  
 Time: 12:00:00  
 Date: 20150112  
 Time: 12:00:00  
 F2 - Processing parameters  
 Name: SKJ-6-32A  
 Date\_UTC: 20150112 12:00:00  
 Time: 12:00:00  
 Date: 20150112  
 Time: 12:00:00  
 F2 - Reference parameters  
 Name: SKJ-6-32A  
 Date\_UTC: 20150112 12:00:00  
 Time: 12:00:00  
 Date: 20150112  
 Time: 12:00:00

SKJ-6-50

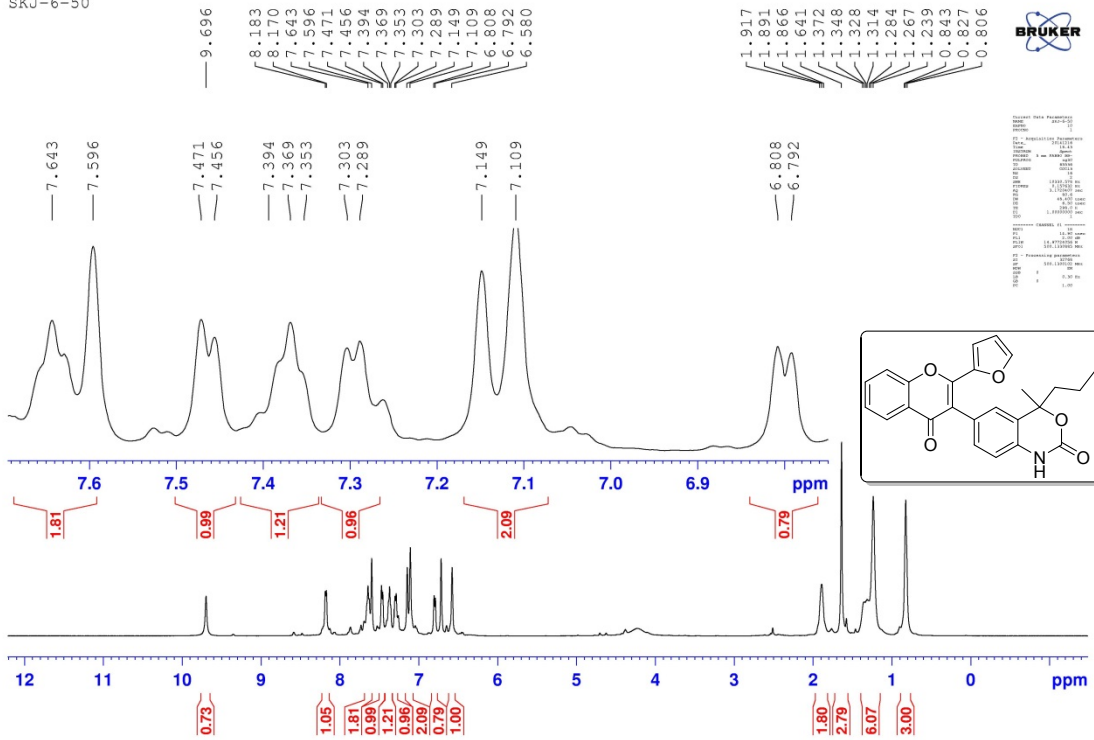

SKJ-6-50C13

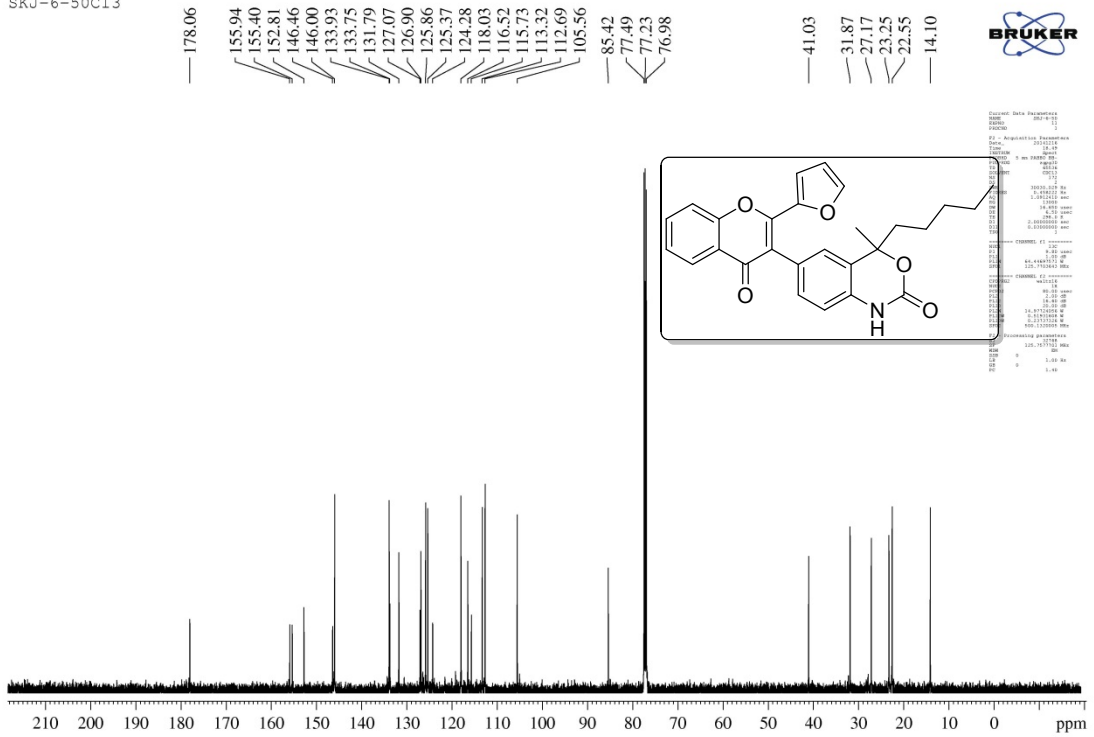

SKJ-6-42

9.172  
8.758  
8.205  
8.185  
7.678  
7.662  
7.646  
7.612  
7.489  
7.472  
7.401  
7.386  
7.371  
7.260  
7.127  
7.121  
6.728  
6.597  
6.049  
6.027  
6.015  
5.994  
5.985  
5.963  
5.248  
5.227  
5.204  
5.183  
5.137  
5.102  
5.088  
5.053

— 1.812

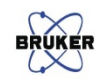

```

Current Data Parameters
NAME: SKJ-6-42
EXPNO: 10
PROCNO: 1
F2 - Acquisition Parameters
Date_ : 201212
Time: 13.27
INSTRUM: ssi
PROBHD: 5 mm PABBO 90
PULPROG: zgpg30
SFO1: 225
SFO2:
SOLVENT: DMS-D6
NS: 512
DS: 4
SWH: 10330.516 Hz
FIDRES: 0.131410 Hz
AQ: 3.117047 Hz
RG: 48.433 Hz
SF: 225.000 MHz
WDW: EM
SSB: 0
LB: 2.00 Hz
GB: 0
PC: 1.0000000 sec
TD: 65536
SFO1: CHANNEL F1
NUC1: 13C
P1: 14.00 Hz
PL1: 0.00 dB
NUC2: 13C
P2: 14.00 Hz
PL2: 0.00 dB
SFO2: 500.1328000 MHz
F2 - Processing parameters
SI: 32768
SF: 500.1328000 MHz
WDW: EM
SSB: 0
LB: 0.30 Hz
GB: 0
PC: 1.00
  
```

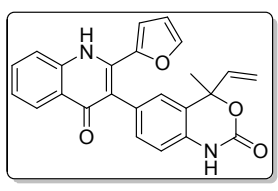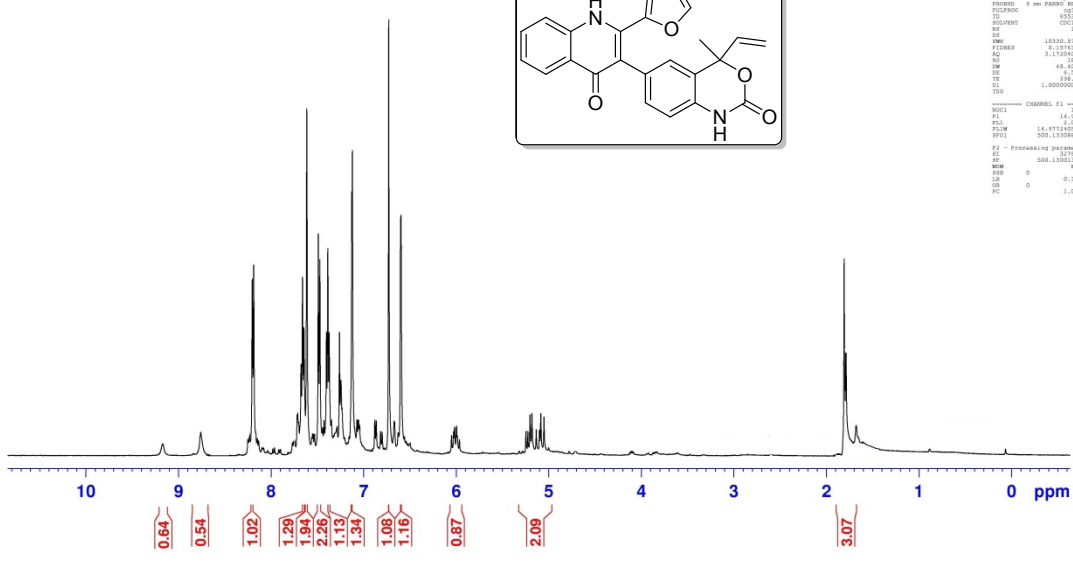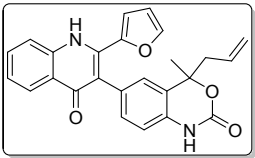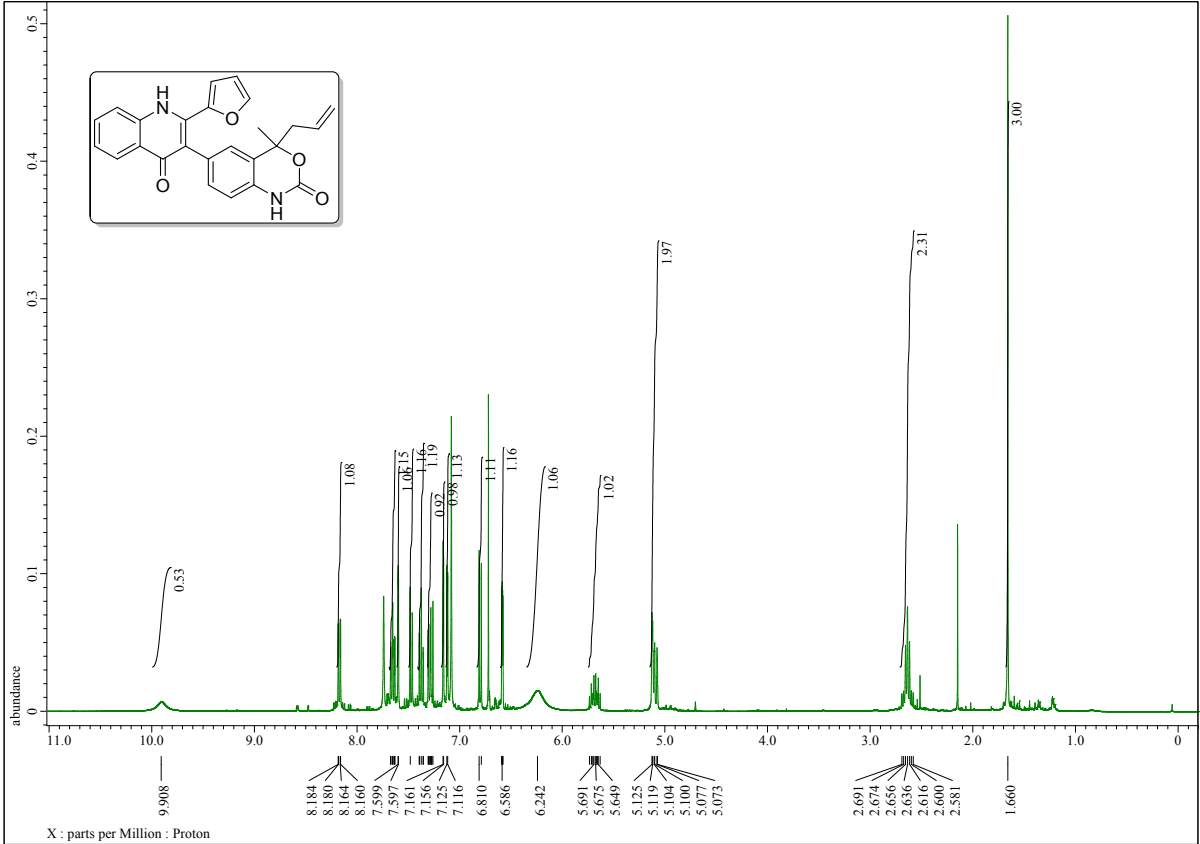

SKJ-6-55

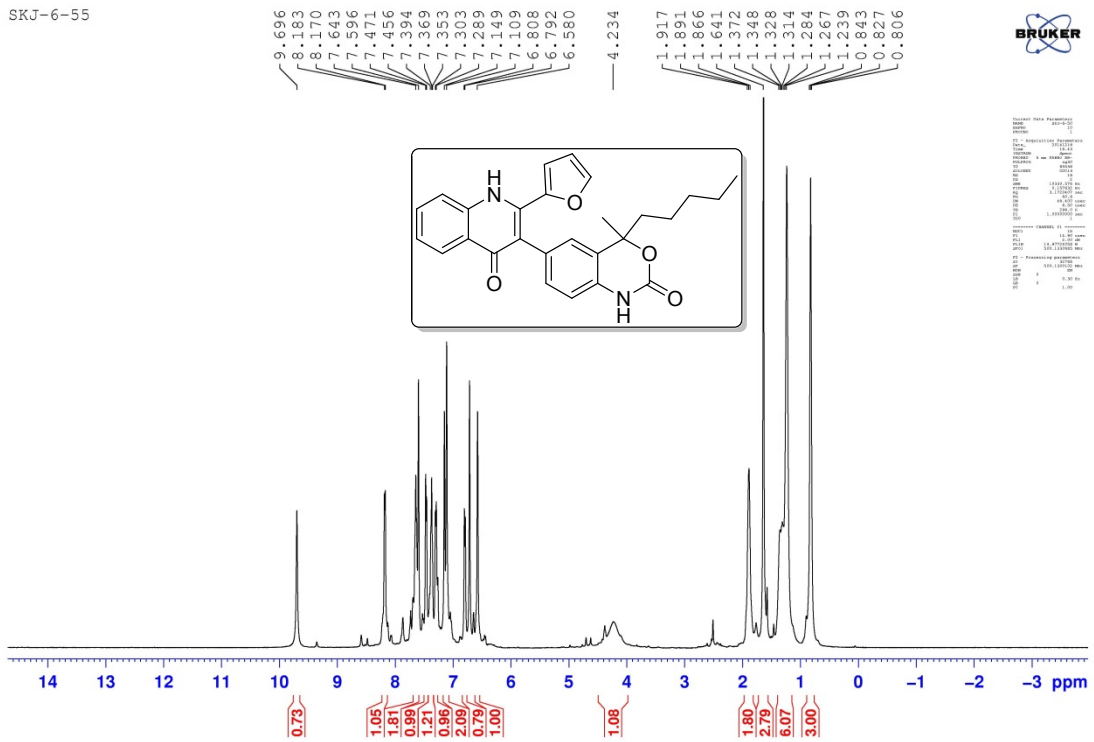

SKJ-6-55 C13

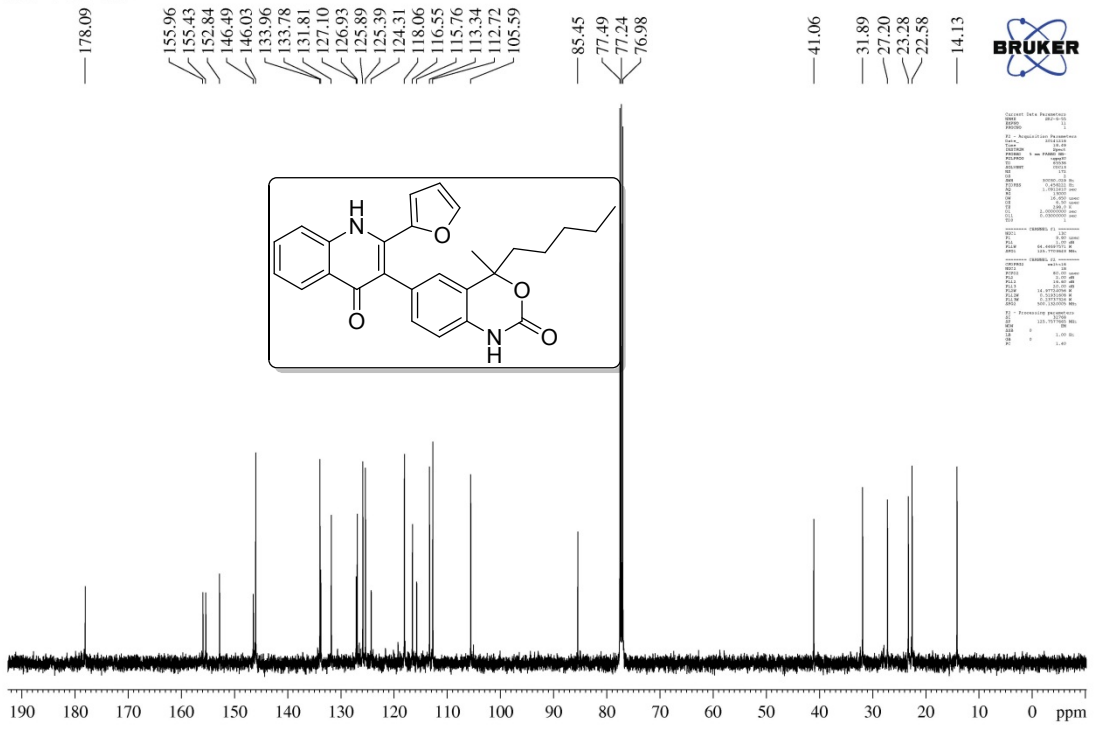

skj-3-23

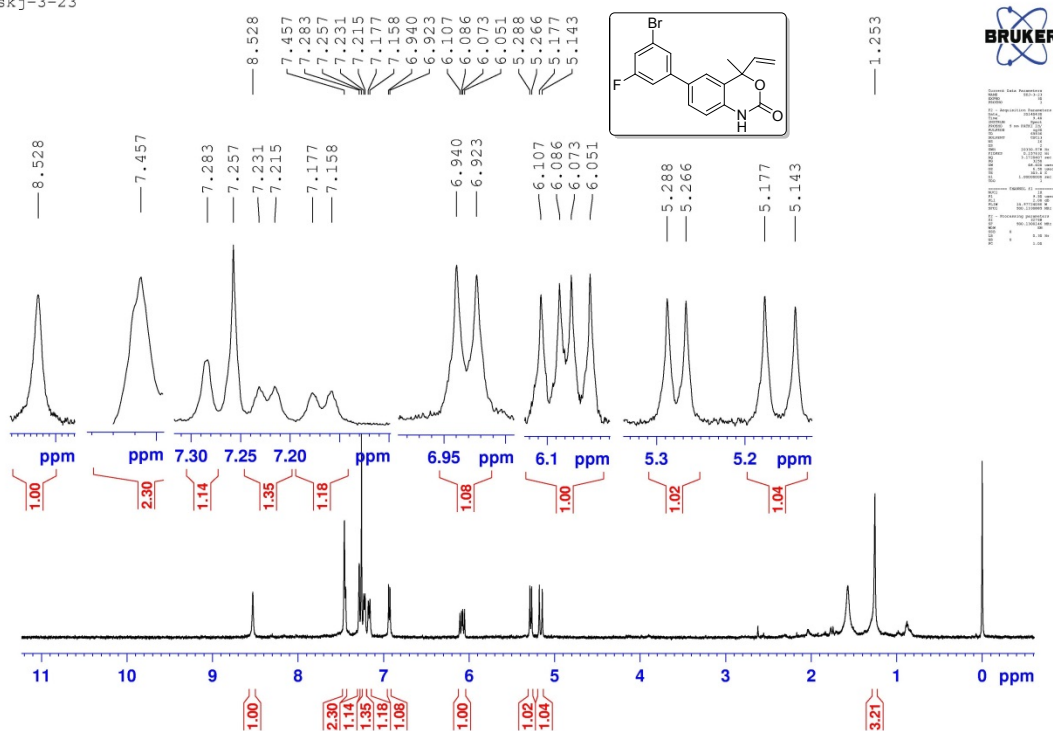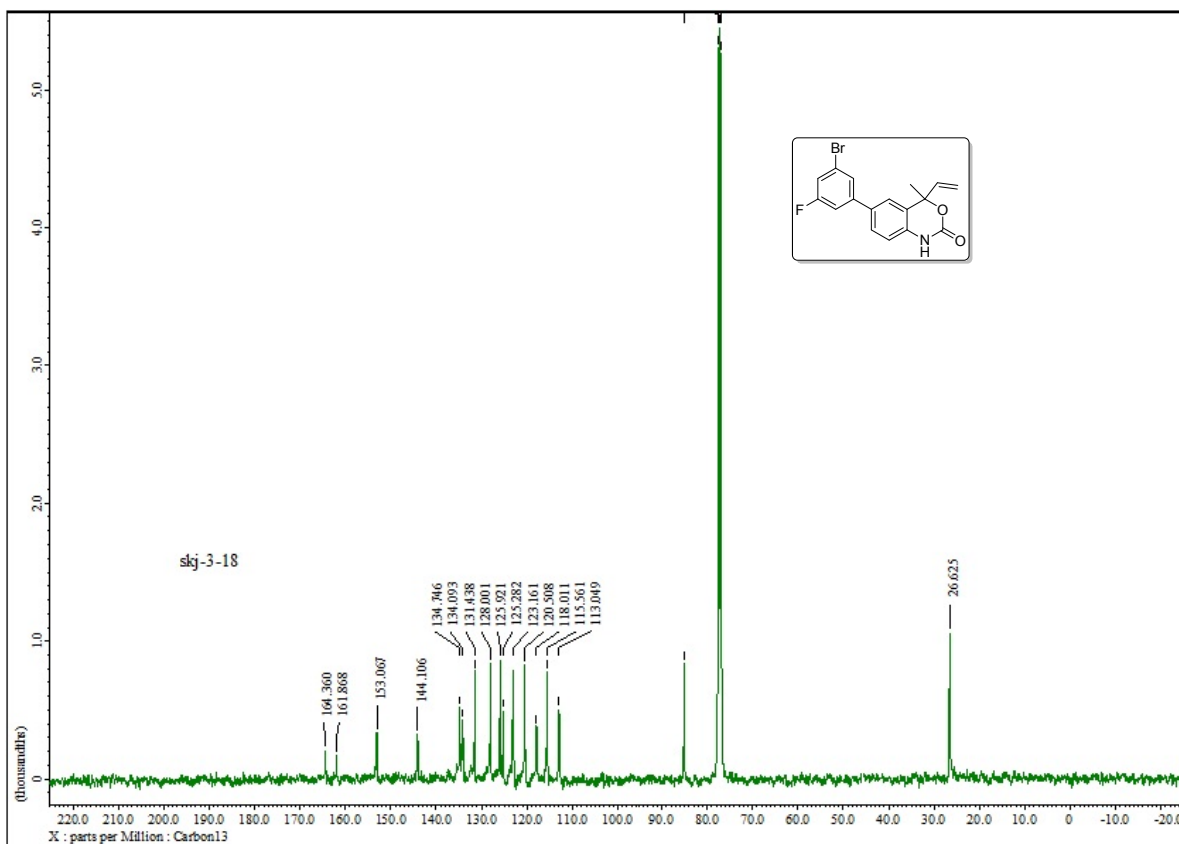

SKJ-3-18

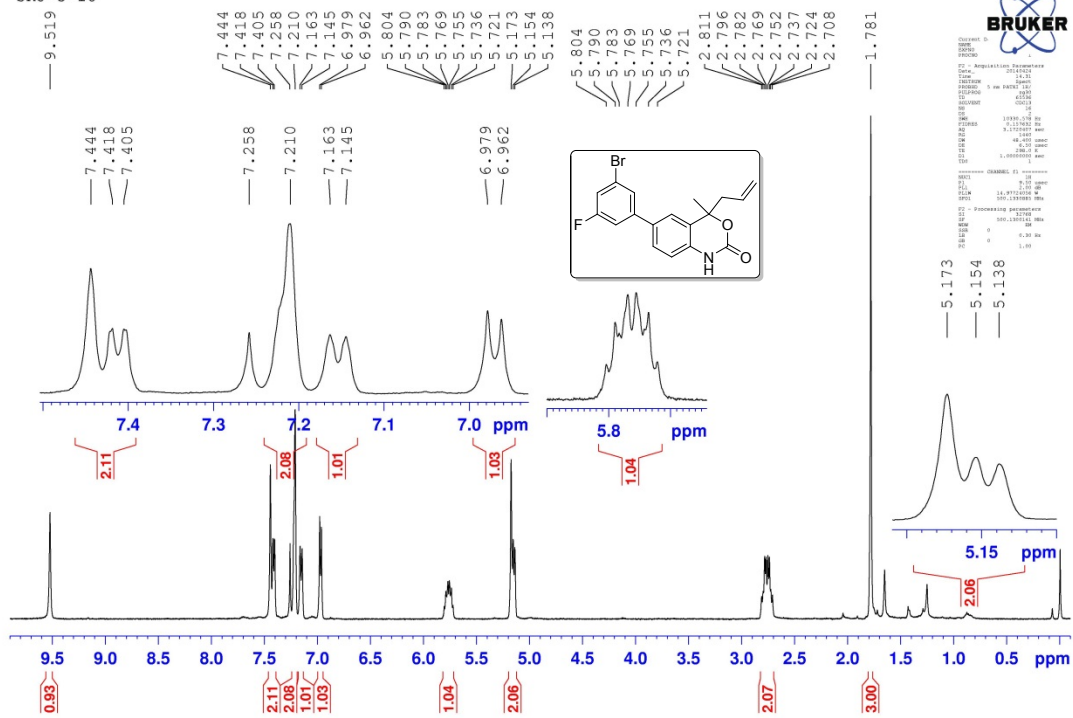

**BRUKER**

CHANNEL F1  
 Name: SKJ-3-18  
 Date: 11/11/2011  
 Time: 14:25  
 Program: zgpg30  
 Processor: zgpg30  
 Acquisition Parameters  
 Date\_ : 11/11/2011  
 Time\_ : 14:25  
 Name\_ : SKJ-3-18  
 ExpNO : 1  
 F2 - Acquisition Parameters  
 Date\_ : 11/11/2011  
 Time\_ : 14:25  
 Name\_ : SKJ-3-18  
 ExpNO : 1  
 F2 - Processing parameters  
 Date\_ : 11/11/2011  
 Time\_ : 14:25  
 Name\_ : SKJ-3-18  
 ExpNO : 1  
 F2 - Reference parameters  
 Date\_ : 11/11/2011  
 Time\_ : 14:25  
 Name\_ : SKJ-3-18  
 ExpNO : 1

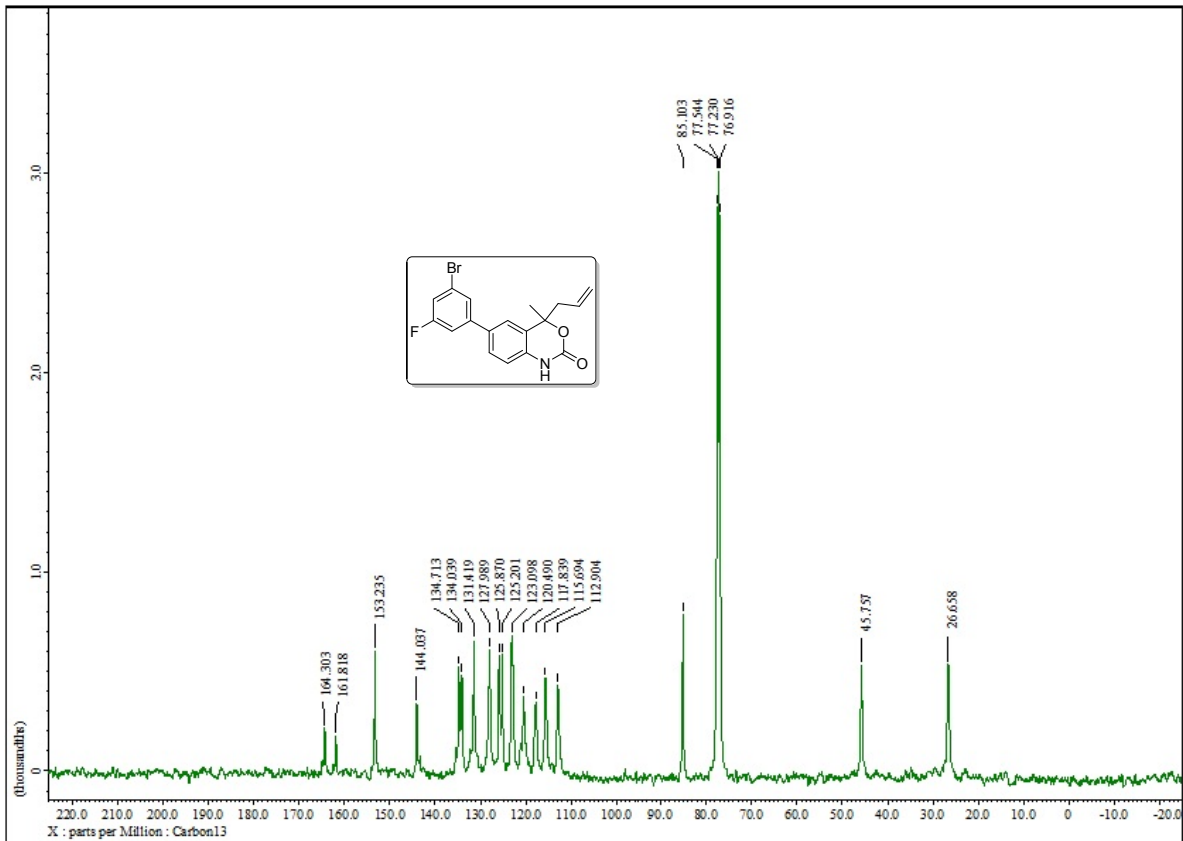

Supplement: c5ra15274g1.pdf [file c5ra15274g1.pdf]
